# 1 Long acyl chain ceramides govern cholesterol and cytoskeleton dependence 2 of membrane outer leaflet dynamics

3 Anjali Gupta<sup>1,2</sup>, Sneha Muralidharan<sup>1</sup>, Federico Torta<sup>4</sup>, Markus R. Wenk<sup>1,4</sup>, Thorsten  
4 Wohland<sup>1,2,3\*</sup>

5 <sup>1</sup>Department of Biological Sciences, National University of Singapore, 14 Science Drive 4,  
6 Singapore

7 <sup>2</sup>NUS Centre for Bio-Imaging Sciences, National University of Singapore, 14 Science Drive  
8 4, 117557, Singapore

9 <sup>3</sup>Department of Chemistry, National University of Singapore, 3 Science Drive 3, 117543,  
10 Singapore

11 <sup>4</sup>Department of Biochemistry, National University of Singapore, 3 Science Drive 3, 117543,  
12 Singapore

13 \*Correspondence: [twohland@nus.edu.sg](mailto:twohland@nus.edu.sg)

14

## 15 ABSTRACT

16 The cellular plasma membrane composition and organization is crucial for the regulation of  
17 biological processes. Based on our earlier work showing that the same lipid probe, DiI, exhibits  
18 different dynamics in CHO-K1 and RBL-2H3 cells, we investigate the molecular factors that  
19 govern these differences. First, we determined that the cytoskeleton-interacting  
20 Immunoglobulin E receptor (FcεRI), which is abundant in RBL-2H3 but not in CHO-K1 cells,  
21 is not responsible for the DiI confinement found in RBL-2H3 cells. Second, lipid mass  
22 spectrometry of the plasma membrane of the two cells indicated differences in ceramide  
23 content, especially with long and very long acyl chains (C16 to C24). We, therefore, measure  
24 membrane dynamics by imaging total internal reflection fluorescence correlation spectroscopy  
25 in dependence on these ceramides. Our results show that C24 and C16 saturated ceramides  
26 uniquely alter the membrane dynamics by promoting the formation of cholesterol-independent  
27 domains and by elevating inter-leaflet coupling.

28

## 29 INTRODUCTION

30 Among the factors contributing to the lateral heterogeneity in plasma membranes are lipid  
31 domains or “lipid rafts” and the cytoskeleton network in proximity to the plasma membrane  
32 inner leaflet<sup>1-4</sup>. To understand the complex membrane structure and dynamics, artificially  
33 reconstituted model membranes have provided important insights<sup>5-15</sup>. But they cannot  
34 recapitulate all physiologically relevant characteristics. For instance, in phase-separated model  
35 membranes, micron-sized domains of a specific phase (liquid disordered and liquid ordered)  
36 can be observed, while in cell membranes the size of the domains is below the diffraction limit<sup>2</sup>.  
37 In addition, about 30-50% of the area in a natural membrane is occupied by a range of  
38 structurally diverse proteins that influence the nanoscale organization of the membrane in  
39 critical ways<sup>16-18</sup>. Moreover, intact cell membranes exhibit phospholipid asymmetry which is  
40 challenging to mimic in model membranes, although recent progress in reconstituting  
41 asymmetric membranes has been made<sup>19-21</sup>. In asymmetric model membranes, the domain-  
42 forming lipids, such as sphingolipids, are localized in the outer leaflet while unsaturated lipids,  
43 such as PS, PI, or PA, which cannot form domains on their own, are localized in the inner  
44 leaflet of the membrane<sup>22-24</sup>. However, in cell membranes, a particular lipid may not be very  
45 strictly confined to one leaflet, and the proportion of lipids distributed in the two-leaflets can  
46 differ across cell types which can result in diverse membrane properties<sup>25</sup>. Recently, Li et al.  
47 have developed a method to estimate the proportion of lipids residing exclusively in the outer  
48 leaflet but this still needs to be utilized for the understanding of cell-type compositional  
49 differences<sup>19</sup>. Giant plasma membrane vesicles (GPMVs) preserve the compositional  
50 complexity of the cell membrane<sup>26</sup> but they lack an actin cytoskeleton and the asymmetric  
51 organization of lipids and thus do not recapitulate the results of the original membranes.  
52 Therefore, for physiologically relevant results, it is necessary to analyze membrane dynamics  
53 in natural cell membranes.

54 In a recent study from our group, we compared the diffusive behaviour of two outer leaflet  
55 markers 1,1'-dioctadecyl-3,3',3'-tetramethylindocarbocyanine (DiI-C<sub>18</sub>), an outer membrane  
56 free diffusion marker, and GFP-GPI, a marker of domain confined diffusion, across five cell  
57 types namely, CHO-K1, HeLa, RBL-2H3, SH-SY5Y, WI-38<sup>27</sup>. We utilized imaging total  
58 internal reflection fluorescence correlation spectroscopy (ITIR-FCS) and the FCS diffusion law  
59 to obtain the diffusion coefficient ( $D$ ) and diffusion law intercept ( $\tau_0$ ), an indicator of membrane  
60 organization. Our results showed that DiI-C<sub>18</sub> exhibits confined diffusion in RBL-2H3 cells at  
61 298 K unlike in the other four cell lines tested where it shows free diffusion. Furthermore, we  
62 estimated the Arrhenius activation energy ( $E_{Arr}$ ) of diffusion, a determinant of molecular

63 packing, for the markers across these cell types. The  $E_{Arr}$  of DiI-C<sub>18</sub> in RBL-2H3 cell  
64 membranes was significantly higher compared to other cell lines and was comparable with the  
65  $E_{Arr}$  of a cholesterol-dependent domain marker (GFP-GPI). Consequently, in RBL-2H3 cells  
66 DiI-C<sub>18</sub> showed properties of domain confined diffusion and a weak dependence on the  
67 cytoskeleton. These observations imply a stronger transbilayer coupling in RBL-2H3 cells as  
68 compared to CHO-K1 cells, and indicate some DiI-C<sub>18</sub>/domain interactions in RBL-2H3 cell  
69 membranes. This study demonstrated that membrane lateral dynamics and organization varies  
70 across different cell types, and there is a differential strength of inter-leaflet coupling across  
71 the cell types<sup>27</sup>. We therefore endeavoured to identify which membrane components govern  
72 the lateral and transbilayer dynamics in cell membranes.

73 There is substantial evidence for the occurrence of transient nanodomains in the outer leaflet  
74 of cell membranes that can explain their lateral organization<sup>14,28-39</sup>. However, transbilayer  
75 coupling in cell membranes is not very well understood. One of the most important propositions  
76 to explain this phenomenon is the "picket fence model." According to the "picket fence model,"  
77 membrane compartmentalization and transbilayer coupling can be mediated by transmembrane  
78 proteins, which are in contact with the actin cytoskeleton network<sup>1</sup>. In addition, reports are  
79 suggesting that long acyl chain or negatively charged lipids are responsible for transbilayer  
80 coupling. Experimental reports based on model membranes have shown that domains in the  
81 outer leaflet of the membrane can influence the organization of the membrane inner leaflet  
82 resulting in inner-leaflet domain formation<sup>40,41</sup>. Raghupathy et al. proposed that interaction of  
83 the actin cytoskeleton with the inner leaflet long acyl chain lipids is responsible for transbilayer  
84 coupling<sup>42</sup>. They observed that long acyl chain phosphatidylserine lipids in the inner leaflet  
85 interdigitate with the long acyl chain sphingomyelins in the outer leaflet of the membrane,  
86 thereby facilitating transbilayer coupling. It was also observed that the actin cytoskeleton forms  
87 domains in the membrane via their contacts with phosphoinositide lipids in a concentration-  
88 dependent manner<sup>43</sup>. Thus, both membrane lipids and transmembrane proteins can form  
89 ordered membrane domains and can mediate transbilayer coupling. Based on the observations  
90 mentioned earlier and existing literature<sup>16,44-50,27</sup>, RBL-2H3 cells are a potential model system  
91 to characterize the factors that cause transbilayer coupling.

92 In the current work, we study the effect of transmembrane protein density on DiI-C<sub>18</sub> diffusion  
93 in RBL-2H3 cell membranes and how it influences the link of outer leaflet lipid dynamics with  
94 cholesterol and the cytoskeleton network. One of the most abundant transmembrane receptors  
95 in RBL-2H3 cells is the high affinity Immunoglobulin E receptor (FcεRI). FcεRI interact with

96 the actin cytoskeleton and induce compartmentalization in the membrane<sup>49,48</sup>. Moreover, DiI-  
97 C<sub>18</sub> co-distributes with the high density of FcεRI on RBL-2H3 cell membranes<sup>44,45</sup>. So, we  
98 reduced the density of FcεRI to determine if that weakens the connections of DiI-C<sub>18</sub> diffusion  
99 with cholesterol and cytoskeleton. Furthermore, we compare the lipid composition of RBL-  
100 2H3 and CHO-K1 plasma membranes using mass spectrometry. Our results show that RBL-  
101 2H3 cell membranes possess significantly higher levels of ceramides and sphingomyelins. We  
102 therefore manipulate the levels of sphingolipids in the cell membrane and probe how the links  
103 of the outer leaflet lipid diffusion with cholesterol and the cytoskeleton are influenced. We  
104 show that the tuning of sphingolipid composition plays a crucial role in orchestrating the link  
105 of cholesterol and cytoskeleton with the outer leaflet lipid diffusion. Specifically, ceramides  
106 are sufficient to induce connections of the outer leaflet lipid diffusion with cholesterol and  
107 cytoskeleton in cell membranes. Furthermore, ceramides with saturated long and very long acyl  
108 chains show a greater tendency to form cholesterol independent domains and mediate  
109 cytoskeleton-induced domain formation in the outer leaflet.

110

## 111 RESULTS

112 In this section we report on the dynamics and organization of cell membranes using two  
113 parameters measured by ITIR-FCS. The first is the diffusion coefficient ( $D$ ) that reports on the  
114 mobility of molecules in the membrane and is inversely related to viscosity and which is  
115 expected to decrease with an increase of transient trapping of molecules in domains. The  
116 second parameter is the diffusion law intercept ( $\tau_0$ ). The diffusion law, as explained in the  
117 Materials and Methods section, measures how the diffusion coefficient changes with the length  
118 scale, i.e. the size of the area, over which it is measured<sup>51,52</sup>. The diffusion law intercept is  
119 expected to be close to 0 for free diffusion. It is expected to be positive for transient entrapment  
120 ( $\tau_0 > 0.1s$ ), e.g. in cholesterol dependent domains, and negative ( $\tau_0 < -0.1s$ ) for hop diffusion,  
121 i.e. if molecular diffusion is hindered by a meshwork, e.g. the cytoskeleton (Figure 1A). In  
122 cases where a molecule is transiently trapped and at the same time is hindered by a meshwork,  
123 the intercept will be a weighted average and thus the absolute intercept value is not indicative  
124 of the diffusive mode. In these cases, we have recently shown that a decrease or increase in the  
125 intercept upon disruption of domain or the cytoskeleton is an indication for transient trapping  
126 or hop diffusion, respectively<sup>53</sup>. Finally, measurement errors for the diffusion coefficient on

127 the same cell are typically 20% (Figure *S1D*) and we therefore will report changes in diffusion  
 128 coefficient as significant only if they exceed this value.

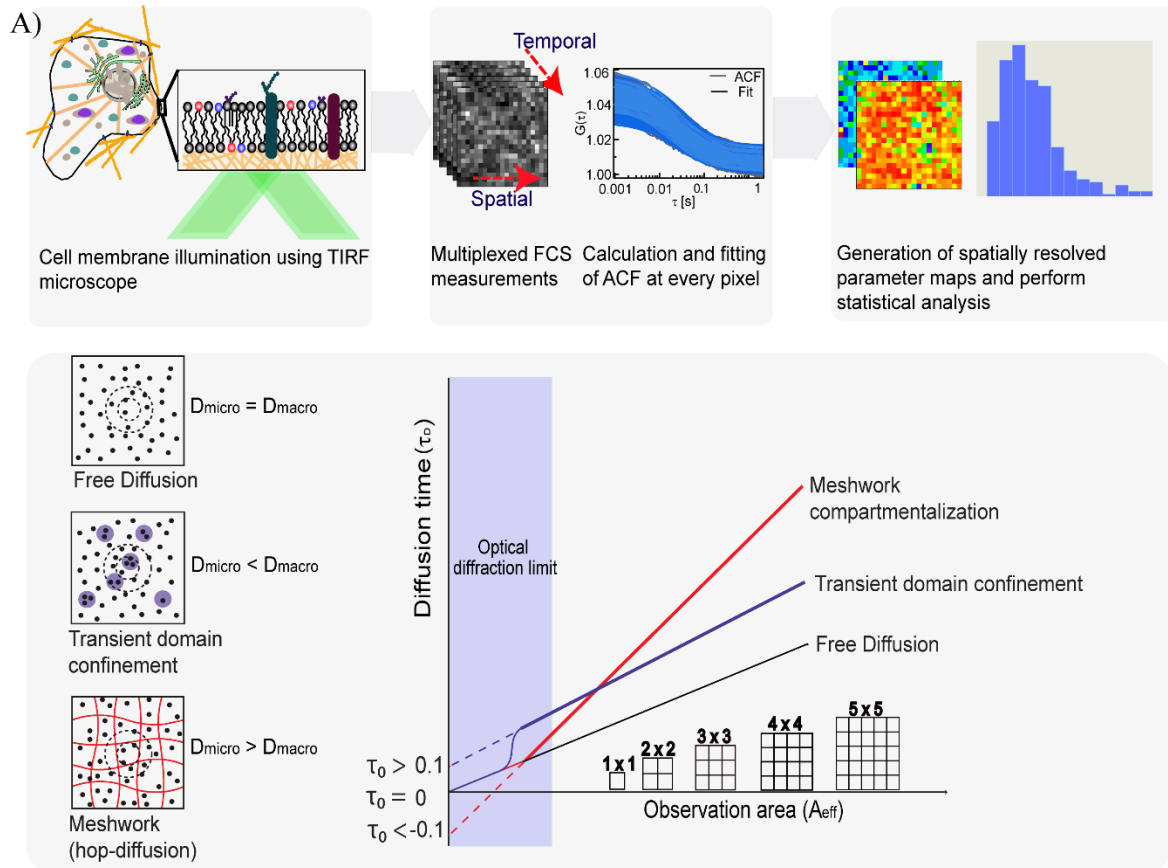

B)

|            | Diffusion coefficient<br>( $\mu\text{m}^2/\text{s}$ ) | Diffusion law intercept<br>(s) |
|------------|-------------------------------------------------------|--------------------------------|
| RBL-2H3    | $1.08 \pm 0.18$                                       | $0.09 \pm 0.03$                |
| RBLIgE (-) | $0.62 \pm 0.17$                                       | $0.43 \pm 0.17$                |

129

130 **Figure 1:** (A) Illustration of a typical imaging total internal reflection fluorescence correlation  
 131 spectroscopy experiment workflow and imaging FCS diffusion law analysis. (B) Comparison  
 132 of diffusion coefficients ( $D$ ) and imaging diffusion law plot intercepts ( $\tau_0$ ) in RBL-2H3 cells  
 133 and RBL-IgE(-) cells. Average  $\pm$  standard deviation (SD) of at least  $n=3$ . Refer to Fig *S1* for  
 134 representative raw data.

135

### 136 **Fc $\epsilon$ RI knockdown increases DiI-C<sub>18</sub> confinement in RBL-2H3 cells**

137 DiI-C<sub>18</sub> exhibits a positive  $\tau_0$  in RBL-2H3 cells at 25 °C that converges to 0 either if cholesterol  
 138 is depleted or if the temperature is raised to 37 °C, indicating transient domain trapping. In  
 139 addition, it showed a weak cytoskeleton dependence in this cell line, indicated by a rise in  $\tau_0$   
 140 when the cytoskeleton was disrupted. In contrast, in CHO-K1 cells, the  $\tau_0$  is always close to 0

141 independent of cholesterol and the cytoskeleton<sup>27</sup>. To determine whether the high level of  
 142 FcεRI is the cause for this diffusive behaviour of DiI-C<sub>18</sub>, we reduced FcεRI levels by siRNA  
 143 mediated knockdown in RBL-2H3 cells (referred to as RBL-IgE(-)). FcεRIα knockdown was  
 144 confirmed by western blotting (Fig S2A) and staining of cells with a fluorescently labelled  
 145 FcεRI receptor antibody (Fig S2B). Measurements were performed at 37 °C before and after  
 146 FcεRI knockdown. However, after FcεRI knockdown, the  $D$  of DiI-C<sub>18</sub> decreased by 43% (Fig  
 147 1B) and  $\tau_0$  increased from a value close to 0 for free diffusion to 0.43 s (Fig 1B), implying that  
 148 DiI-C<sub>18</sub> is transiently trapped.

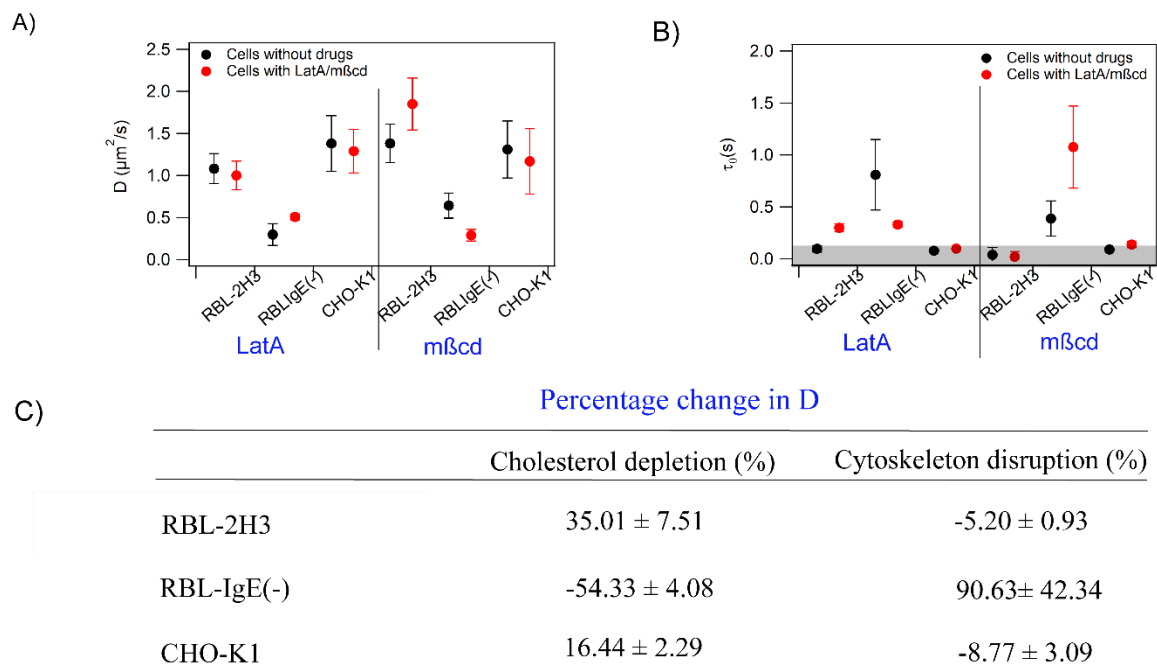

149

150 **Figure 2:** Effect of cholesterol depletion and cytoskeleton disruption in CHO-K1, RBL-2H3  
 151 and RBL-IgE(-) cells (A) Comparison of diffusion coefficients ( $D$ ) of DiI-C<sub>18</sub> in CHO-K1,  
 152 WT-RBL-2H3, and RBL-IgE(-) cells upon mβcd and Lat A treatments (B) Comparison of  
 153 imaging FCS diffusion law plot intercepts ( $\tau_0$ ) obtained for DiI-C<sub>18</sub> in CHO-K1, RBL-2H3 cells  
 154 and RBL-IgE(-) cells upon mβcd and Lat A treatments. Error bars represent standard deviation  
 155 (SD) of at least n=3. Data represent an average of at least three independent experiments.

156

157

158 **DiI-C<sub>18</sub> diffusion exhibits a stronger dependence on cholesterol and the cytoskeleton in**  
 159 **RBL-IgE(-) cells**

160 Next we probed the sensitivity of DiI-C<sub>18</sub> diffusion to cholesterol content and cytoskeleton  
 161 integrity in RBL-IgE(-) cell membranes. DiI-C<sub>18</sub> diffusion was measured before and after drug

162 treatments and results were compared with the DiI-C<sub>18</sub> diffusion properties measured on CHO-  
163 K1 and RBL-2H3 cell membranes.

164 DiI-C<sub>18</sub> diffusion on CHO-K1 cells shows changes that are within the margins of error and are  
165 not significant (Figure 2 *A, B, C*). In RBL-2H3 cells, cytoskeletal disruption resulted in an  
166 increase in  $\tau_0$  (0.10 s to 0.24 s) and no significant difference in  $D$ . Cholesterol depletion led to  
167 an increase in  $D$  by 35% but no significant change in  $\tau_0$ . These results suggest that in CHO-K1  
168 cells DiI-C<sub>18</sub> diffusion is not linked to cholesterol or the cytoskeleton, while in RBL-2H3 cells  
169 DiI-C<sub>18</sub> diffusion is hindered by both cholesterol and the cytoskeleton. Interestingly, in RBL-  
170 IgE(-) cells, cytoskeleton disruption resulted in an increase of  $D$  by 90% and we observed a  
171 drop in  $\tau_0$  from 0.8 s to 0.3 s. Cholesterol depletion caused a drop in  $D$  by 54%, and an increase  
172 in  $\tau_0$  from 0.38 s to 1 s. Much to our surprise, in RBL-IgE(-) cells, instead of any decrease in  
173 the dependence of DiI-C<sub>18</sub> on cholesterol and cytoskeleton, there was a stronger dependence as  
174 indicated by changes in  $D$  and  $\tau_0$  (Figure 2 *A, B, C*) upon methyl  $\beta$  cyclodextrin (m $\beta$ cd) and  
175 Latrunculin A (Lat A) treatments. Moreover, the effect of cholesterol and the cytoskeleton on  
176 DiI-C<sub>18</sub> diffusion is the inverse of the trend obtained on RBL-2H3 cells, where DiI-C<sub>18</sub>  
177 diffusion becomes faster upon cholesterol removal, as shown by an increase in  $D$  and an  
178 increase in  $\tau_0$  upon cytoskeletal disruption. In summary, Fc $\epsilon$ RI is not responsible for the higher  
179 domain fraction of DiI-C<sub>18</sub> and linking outer leaflet dynamics with the cytoskeleton in RBL-  
180 2H3 cells. However, it significantly influences the membrane dynamics.

181

### 182 **Lipid composition analysis of CHO-K1 and RBL-2H3 plasma membranes using mass** 183 **spectrometry-based approaches**

184 Next, we analyzed the lipid composition of the plasma membranes of CHO-K1 and RBL-2H3  
185 cells using mass-spectrometry-based lipidomic analysis. The comparison shows markedly  
186 different compositions for these two cell types (Table 1). One interesting difference which can  
187 potentially explain higher DiI-C<sub>18</sub> confinement, and  $E_{Arr}$  comparable to that of domain  
188 markers<sup>27</sup>, are the significantly higher levels of sphingolipids, including sphingomyelins and  
189 ceramides, in RBL-2H3 cell membranes. As shown in previous studies<sup>31,54-57</sup>, higher  
190 sphingolipid content can result in the presence of more domains in RBL-2H3 cell membranes  
191 compared to CHO-K1 cells. We therefore followed up on the influence of these lipids on the  
192 dynamics of the plasma membrane in the next sections.

| Lipid species | CHO-K1<br>(% lipid/Total PL) | RBL-2H3<br>(% lipid/Total PL) |
|---------------|------------------------------|-------------------------------|
| PC            | 30.84 ± 5.41                 | 34.42 ± 11.22                 |
| SM            | 4.31 ± 2.5                   | 13.66 ± 4.56                  |
| Cer           | 0.17 ± 0.03                  | 0.59 ± 0.09                   |
| GM3           | 0.30 ± 0.15                  | 0.01 ± 0.003                  |
| LPC           | 0.01 ± 0.004                 | 0.10 ± 0.02                   |
| LPE           | Below detection limit        | 0.44 ± 0.03                   |
| PI            | 20.71 ± 2.12                 | 13.11 ± 5.87                  |
| PG            | 2.18 ± 0.33                  | 11.56 ± 3.40                  |
| PS            | 14.93 ± 1.19                 | 6.00 ± 1.56                   |
| PE            | 26.45 ± 0.53                 | 19.63 ± 5.53                  |

193

194 **Table 1:** Comparison of plasma membrane lipid composition of in CHO-K1 and RBL-2H3  
195 cells by mass spectrometry. Data is represented as average ± standard deviation (SD) of at least  
196 3 replicates. Values are normalized to 100% (concentration/total concentration of detected  
197 lipids). Coefficient of variation was less than 20% for about 97% of the analysed lipids in  
198 technical quality control samples and less than 30% in the remaining samples (refer Figure S3)

199

### 200 **Sphingolipid depletion influences the links of DiI-C<sub>18</sub> diffusion with cholesterol and the** 201 **cytoskeleton in RBL-2H3 and RBL-IgE (-) cells**

202 Since cholesterol and the cytoskeleton influence DiI-C<sub>18</sub> diffusion in RBL-2H3 and RBL-IgE(-  
203 ) inversely, they are interesting tools to explore the role of sphingolipids in altering the outer  
204 leaflet lipid diffusion properties of DiI-C<sub>18</sub>. First, we depleted sphingolipids by treating cells  
205 with myriocin. Myriocin is a common sphingolipid biosynthesis inhibitor<sup>58</sup>. Since myriocin  
206 acts on the first step of the pathway, it affects the levels of all sphingolipids. ITIR-FCS  
207 experiments were performed to measure DiI-C<sub>18</sub> diffusion on myriocin treated RBL-2H3 and  
208 RBL-IgE(-) cells, followed by cholesterol depletion and cytoskeleton disruption.

209 In RBL-2H3 cells, myriocin induced sphingolipid depletion altered DiI-C<sub>18</sub> diffusion as  
210 manifested by a 27% lower  $D$  and a positive  $\tau_0$  (Figure 3 A,B) implying the occurrence of  
211 transient domain trapping. In RBL-2H3 cells treated with myriocin, cholesterol depletion  
212 causes a 69% drop in  $D$  and an increase in  $\tau_0$  from 0.2 s to 1.1 s, indicating an increase of  
213 transient domain trapping. This is possibly the case because of non-specific clustering of DiI-  
214 C<sub>18</sub> with FcεRI on RBL-2H3 cell membranes.<sup>44,45</sup> In myriocin-treated RBL-IgE(-) cells, DiI-  
215 C<sub>18</sub> diffusion shows a 33% rise in  $D$  and a drop in  $\tau_0$  from 0.43 s to 0.28 s owing to depletion  
216 of sphingolipid domains (Figure 3 A, B). Due to a lower FcεRI density in these cells, the effect



217 of FcεRI clustering is less pronounced. In these cells, cholesterol depletion leads to a 44%  
218 increase in  $D$  and a drop in  $\tau_0$  from 0.31 s to 0.11 s. Therefore, myriocin-treated RBL-IgE(-)  
219 cells show cholesterol-dependent confinement of DiI-C<sub>18</sub> diffusion. The effect of cytoskeletal  
220 disruption on DiI-C<sub>18</sub> diffusion is similar in both RBL-2H3 and RBL-IgE (-) cells. Both cell  
221 variants show no significant change in  $D$  and  $\tau_0$  (Figure 3 C,D,E). This means that reducing the  
222 membrane sphingolipid levels decreases the connection between the outer leaflet membrane  
223 lipid diffusion and the actin cytoskeleton. These results show that sphingolipids play an  
224 important role in orchestrating the cholesterol-cytoskeletal links with DiI-C<sub>18</sub> diffusion (Figure  
225 3F).

226

### 227 **Sphingomyelinase treatment influences the links of DiI-C<sub>18</sub> diffusion with cholesterol and** 228 **cytoskeleton in RBL-2H3 and RBLIgE (-) cells**

229 Sphingolipids include ceramides, sphingomyelin and glycosphingolipids. The limited literature  
230 on the role of structurally different sphingolipids in regulating biophysical properties of  
231 membranes suggests that they have different impact on the membrane dynamics, based on their  
232 unique physical properties<sup>59,60</sup>. For instance, ceramides can both order and fluidize the  
233 membrane and certain ceramides can form cholesterol independent domains<sup>37,61–63,64</sup>.  
234 Additionally, there is evidence that some ceramide species can cause actin cytoskeleton  
235 remodelling<sup>65</sup>. This led us to speculate that ceramides could cause the rearrangement of  
236 cholesterol-cytoskeletal links. So, to probe the role of ceramides, we treated RBL-2H3 and  
237 RBL-IgE(-) cells with sphingomyelinase, which hydrolyzes the membrane sphingomyelin into  
238 ceramides<sup>66</sup>, increasing the ceramide content in the plasma membrane. Sphingomyelinase  
239 treated cells were subjected to cholesterol depletion and cytoskeleton disruption to analyse the  
240 relationship of DiI-C<sub>18</sub> diffusion with cholesterol and the cytoskeleton under these conditions.  
241 Sphingomyelinase treatment in RBL-2H3 cells resulted in a 50% reduction of  $D$  accompanied  
242 with an increase of  $\tau_0$  from 0 (free diffusion) to 0.3 s (Figure 3 A,B) indicative of transiently  
243 domain trapped diffusion of DiI-C<sub>18</sub>. Cholesterol depletion in sphingomyelinase treated RBL-  
244 2H3 and RBL-IgE(-) cells led to an increase in  $\tau_0$  (RBL-2H3: 0.28 s to 0.60 s and RBL-IgE(-)  
245 ): 0.33 s to 1.33 s) and a significant decrease in  $D$  (RBL-2H3: 0.60  $\mu\text{m}^2/\text{s}$  to 0.40  $\mu\text{m}^2/\text{s}$  and  
246 RBL-IgE(-): 0.59  $\mu\text{m}^2/\text{s}$  to 0.22  $\mu\text{m}^2/\text{s}$ ) (Figure 3 C,D,E) indicating elevated confinement of

247

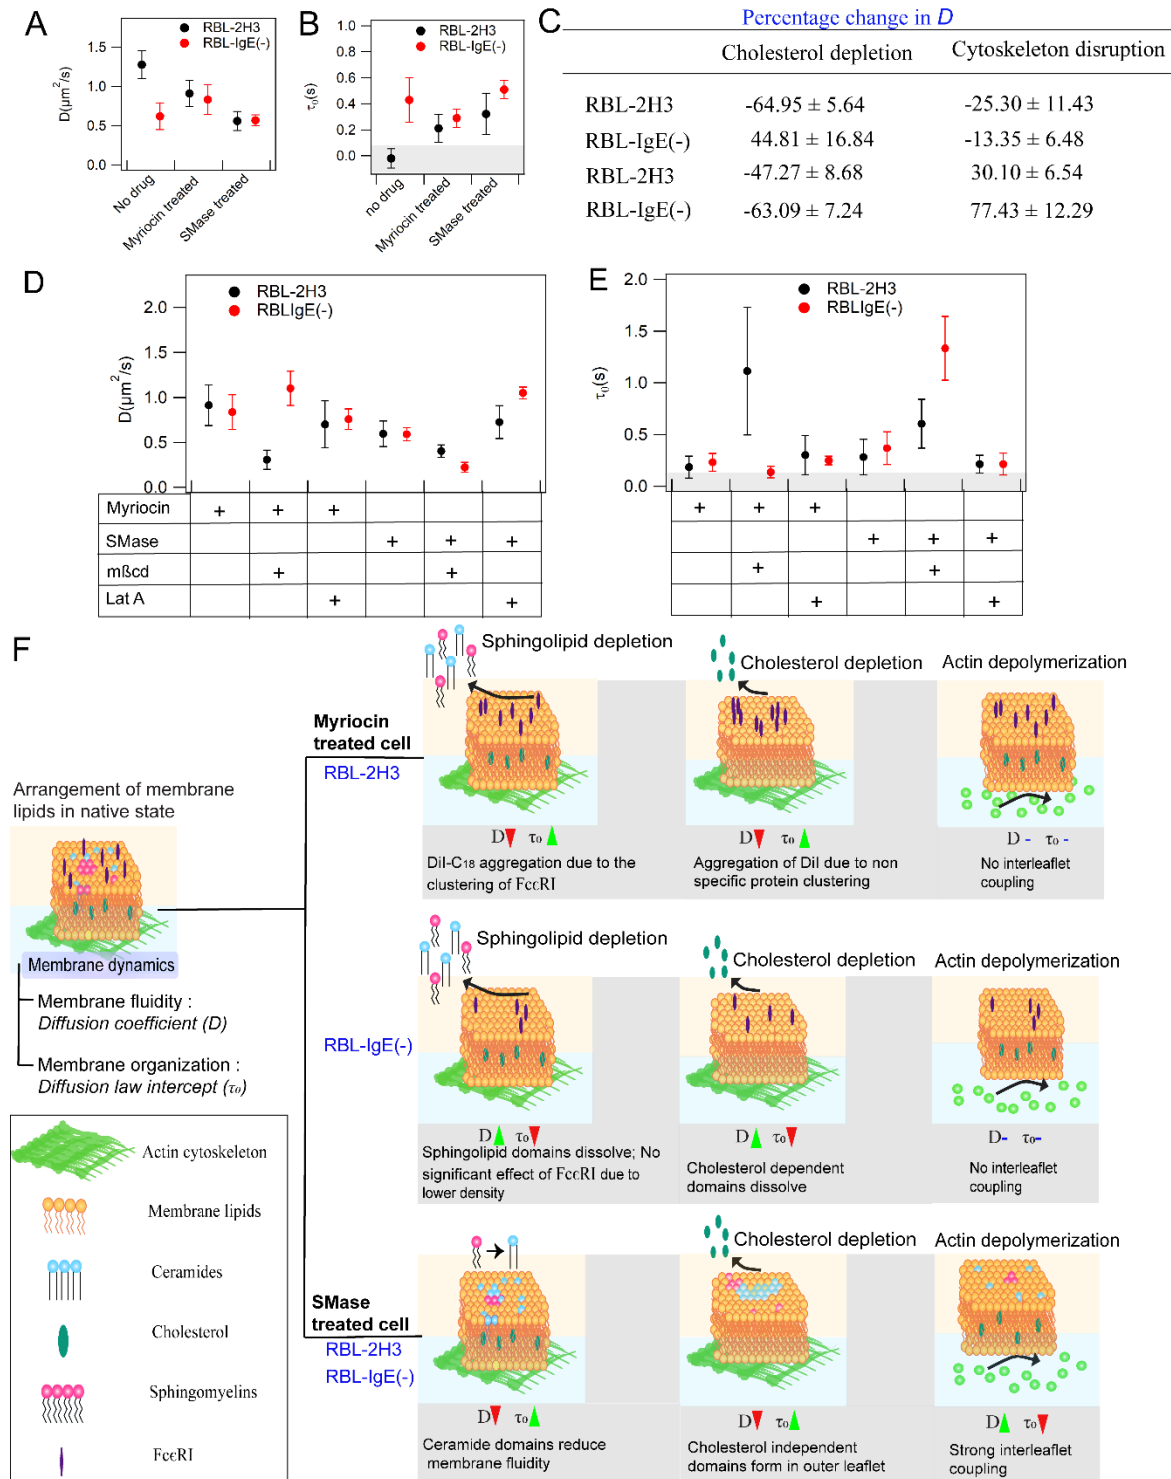

248

249

250 **Figure 3:** Dependence of outer leaflet lipid diffusion on cholesterol and cytoskeleton upon

251 manipulation of sphingolipid levels in RBL-2H3 and RBL-IgE(-) cells. Comparison of DiI-C<sub>18</sub>

252 (A) diffusion coefficients ( $D$ ) and (B) FCS diffusion law intercepts ( $\tau_0$ ) in wildtype, myriocin

253 treated RBL-2H3 cells and RBL-IgE(-) cells upon mβcd and Lat A treatments (C) Percentage

254 change of  $D$ . Variation of (D)  $D$  and (E)  $\tau_0$ . Error bars are standard deviation (SD) of at least

255  $n=3$ . Grey area in (B) and (E) represents the region of free diffusion. (F) Schematic illustration

256 of results. FcεRI are not shown for SMase treatment as in this case DiI-C<sub>18</sub> diffusion is

257 influenced by the change in lipid composition rather than FcεRI density.

258 DiI-C<sub>18</sub> or rise of the ordered domain fraction in the membrane. The cytoskeletal disruption  
 259 caused a reduction in the confinement of DiI-C<sub>18</sub> or a drop in the fraction of ordered domains  
 260 in both cell types as indicated by an increase in  $D$  (RBL-2H3: 0.61  $\mu\text{m}^2/\text{s}$  to 0.78  $\mu\text{m}^2/\text{s}$  and  
 261 RBL-IgE(-): 0.59  $\mu\text{m}^2/\text{s}$  to 1.05  $\mu\text{m}^2/\text{s}$ ) and a decline in  $\tau_0$  (RBL-2H3: 0.36 s to 0.15 s and  
 262 RBL-IgE(-): 0.43 s to 0.20 s) (Figure 3 C,D,E). These results show that an increase in  
 263 ceramides alters the membrane dynamics by reorganizing the lipid domains and the actin  
 264 cytoskeleton (Figure 3F).

265

## 266 Ceramides influence coupling of outer leaflet lipid dynamics with cholesterol and the 267 cytoskeleton

### 268 (a) Exogenous ceramide treatment links outer leaflet lipid dynamics with cholesterol

269 To test if ceramides are sufficient to induce the reorganization of the membrane components,  
 270 we exogenously treated CHO-K1 cells, where DiI-C<sub>18</sub> does not show confined diffusion, with  
 271 those ceramide species which were significantly different in CHO-K1 and the RBL-2H3 cells  
 272 as determined by lipidomic analysis (Figure 4). These ceramide species are asymmetric long  
 273 and very long acyl chain ceramides, namely Cer d18:1/16:0, d18:1/18:0, d18:1/24:0,  
 274 d18:1/24:1. Following the ceramide treatment, cholesterol depletion experiments were  
 275 performed on the same cells.

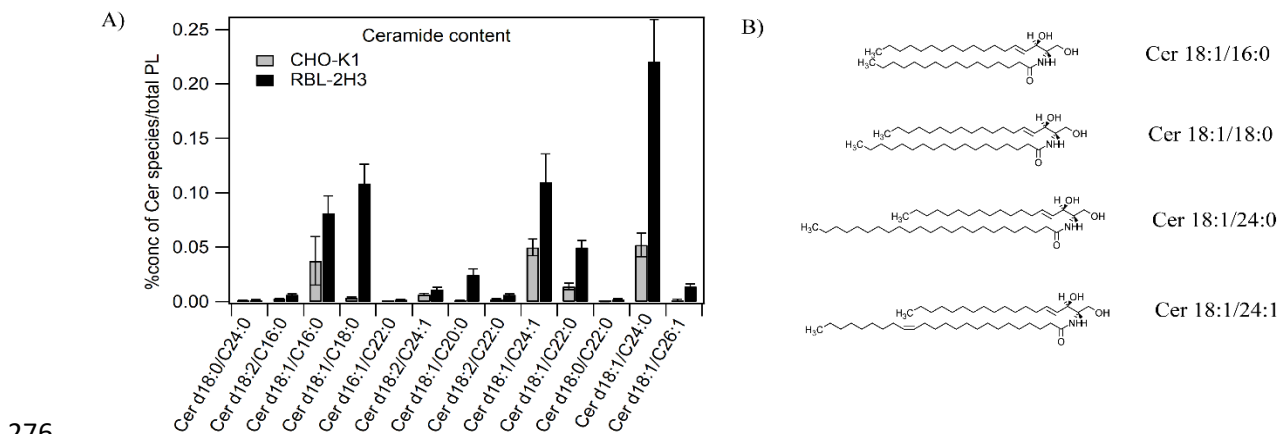

276

277 **Figure 4:** (A) Comparison of plasma membrane ceramide composition in CHO-K1 and RBL-  
 278 2H3 cells analyzed using Agilent 1290 Infinity LC coupled to an Agilent 6495 triple  
 279 quadrupole mass spectrometer. Error bars are the standard deviation (SD) of n=3. Data were  
 280 analyzed by Mass Hunter Quantitative Analysis software. Bars represent values normalized to  
 281 100% (conc/total phospholipid concentration). (B) Chemical structures of Ceramides  
 282 (d18:1/16:0, d18:1/18:0, d18:1/24:0, d18:1/24:1).

283 In untreated CHO-K1 cells, DiI-C<sub>18</sub> diffusion was not sensitive to cholesterol depletion as  
284 shown in Figure 5 *A, B, E*. Treatment of all tested ceramides reduced the *D* of DiI-C<sub>18</sub> and  
285 increased the  $\tau_0$ , and therefore induced confined diffusion of DiI-C<sub>18</sub>. Interestingly, upon  
286 cholesterol depletion, Cer d18:1/16:0 and d18:1/24:0 treated CHO-K1 cells showed an increase  
287 in the DiI-C<sub>18</sub> confinement, as indicated by an increase in  $\tau_0$  and a drop in *D* (Figure 5 *A, B, E*).  
288 In the case of Cer d18:1/24:1, cholesterol removal decreased the confinement of DiI-C<sub>18</sub> in  
289 CHO-K1 cell membranes. Upon treatment with Cer d18:1/18:0, cholesterol removal slightly  
290 reduced the DiI-C<sub>18</sub> confinement. Cer d18:1/24:0 treated cells showed maximum sensitivity to  
291 cholesterol removal as indicated by a 58% reduction in *D* ( $0.96 \mu\text{m}^2/\text{s}$  to  $0.34 \mu\text{m}^2/\text{s}$ ) after the  
292 treatment. These effects are similar to the results in the RBL-2H3 cells, which show cholesterol  
293 hindered DiI-C<sub>18</sub> diffusion even without the addition of ceramides. When RBL-2H3 cells were  
294 additionally treated with Cer d18:1/16:0 and d18:1/24:0, cholesterol depletion increased the  
295 DiI-C<sub>18</sub> confinement, shown by a further increase in  $\tau_0$  (Figure 5 *C, D, E*). In the case of Cer  
296 d18:1/24:1 and d18:1/18:0 treated RBL-2H3 cells, cholesterol depletion lowers the  
297 confinement of DiI-C<sub>18</sub>, as shown by a drop in  $\tau_0$  (Figure 5 *C, D, E*). In RBL-2H3 cells Cer  
298 d18:1/24:0 influences membrane dynamics the most (*D*:  $0.76 \mu\text{m}^2/\text{s}$  to  $0.42 \mu\text{m}^2/\text{s}$ ;  $\tau_0$ : 0.30 s  
299 to 0.80 s).

300 Our results suggest that, at lower cholesterol concentrations, Ceramides (Cer d18:1/16:0 and  
301 Cer d18:1/24:0) can form cholesterol independent domains in the outer leaflet of both CHO-  
302 K1 and RBL-2H3 cell membranes (Figure 5*F*).

### 303 **(b) Exogenous ceramide treatment links outer leaflet lipid dynamics with the** 304 **cytoskeleton**

305 Next, we probed how outer leaflet lipid diffusion connects with the actin cytoskeleton network  
306 in cells treated with these ceramides. Following ceramide treatment, cells labelled with DiI-C<sub>18</sub>  
307 were measured before and after cytoskeleton disruption by Lat A. Cytoskeletal disruption  
308 reduced the confinement of DiI-C<sub>18</sub> in CHO-K1 cells treated with Cer d18:1/16:0 and  
309 d18:1/24:0 as reflected by an increase in *D* and decreased  $\tau_0$  (Figure 6 *A, B, E*). Cytoskeletal  
310 disruption slightly increased the confinement of DiI-C<sub>18</sub> in Cer d18:1/24:1 treated cells. Cer  
311 d18:1/18:0 showed no significant change in the DiI-C<sub>18</sub> diffusion on the CHO-K1 cell  
312 membrane (Figure 6 *A, B, E*). As observed for cholesterol sensitivity, the effect of cytoskeletal  
313 disruption is maximal in the case of Cer d18:1/24:0 treated CHO-K1 cells with a 167% change  
314 of *D* (*D*:  $0.76 \mu\text{m}^2/\text{s}$  to  $2.14 \mu\text{m}^2/\text{s}$ ;  $\tau_0$ : 0.27 s to 0.14 s). Cer d18:1/18:0 shows the least effect

315 on the DiI-C<sub>18</sub> diffusion properties as indicated an insignificant (9%) change in  $D$ . Similarly,  
316 RBL-2H3 cells treated with Cer d18:1/16:0 and d18:1/24:0 show a reduction in DiI  
317 confinement upon cytoskeleton disruption, with Cer d18:1/24:0 showing a maximal effect as  
318 shown by 154% change in  $D$  ( $D$ : 0.27  $\mu\text{m}^2/\text{s}$  to 0.67  $\mu\text{m}^2/\text{s}$ ;  $\tau_0$ : 0.88 s to 0.35 s). In Cer  
319 d18:1/18:0 and d18:1/24:1 treated cells, DiI-C<sub>18</sub> does not show any considerable sensitivity to  
320 cytoskeleton disruption indicated by less than 20% change in  $D$  except that in Cer d18:1/18:0  
321 treated RBL-2H3 cells the cytoskeleton disruption causes a slight increase in  $\tau_0$  (0.45 s to 0.63  
322 s) (Figure 6 C, D, E). In summary, DiI-C<sub>18</sub> diffusion in CHO-K1 cell membranes becomes  
323 sensitive to the cytoskeleton upon ceramide treatment. However, the effect of ceramide  
324 treatment on the arrangement of lipid domains and cytoskeleton varies with the ceramide  
325 species. These results demonstrate that the addition of long and very long chain acyl chain  
326 ceramides into the membrane increases the confinement within the membranes in general and  
327 it establishes links between cytoskeleton and the outer leaflet lipid dynamics.

328 We next investigated if ceramides can cause any actin cytoskeleton restructuring which could  
329 explain the influence of cytoskeleton disruption on DiI-C<sub>18</sub> diffusion. For this purpose, we  
330 treated the CHO-K1 and RBL-2H3 cells expressing lifeact-GFP with the same set of ceramides  
331 that have been tested in the previous experiments and performed TIRF microscopy. Lifeact is  
332 a 17-amino-acid peptide, which is used in eukaryotic cells to stain filamentous actin (F-actin)  
333 structures<sup>67</sup>. It does not interfere with the dynamical changes in actin both *in vitro* and *in vivo*,  
334 therefore it allows the visualization of actin dynamics in cells. TIRF microscopy focuses  
335 specifically on the cytoskeleton network near the membrane.

336 The cytoskeletal arrangements in CHO-K1 cells and RBL-2H3 cells are entirely different. At  
337 the microscopic level, CHO-K1 (Figure S4A) cells showed lifeact-labeled stress fibers while  
338 RBL-2H3 (Figure S5) cells showed lifeact puncta.

339 On treating CHO-K1 cells with Cer d18:1/16:0 and Cer d18:1/24:0, the number of filaments  
340 decreased, and the length of existing filaments was shorter (Figure S4 B, C). On the other hand,  
341 there was no quantifiable microscopic difference in the actin cytoskeleton arrangement on  
342 treating the cells with Cer d18:1/18:0 and d18:1/24:1. In the case of RBL-2H3 cells, the  
343 addition of Cer d18:1/16:0 and d18:1/24:0 decreased the number of lifeact puncta, and the  
344 overall intensity was significantly reduced (Figure S5 A, B). Cer d18:1/18:0 and d18:1/24:1  
345 treatment in RBL-2H3 cells did not show any significant effect on the actin cytoskeleton  
346 rearrangement. These observations suggest that Cer d18:1/16:0 and d18:1/24:0 disorganize the

347 actin cytoskeleton network proximal to the membrane. Cer d18:1/18:0 and d18:1/24:1 do not  
 348 alter cytoskeleton structure at the microscopic level.

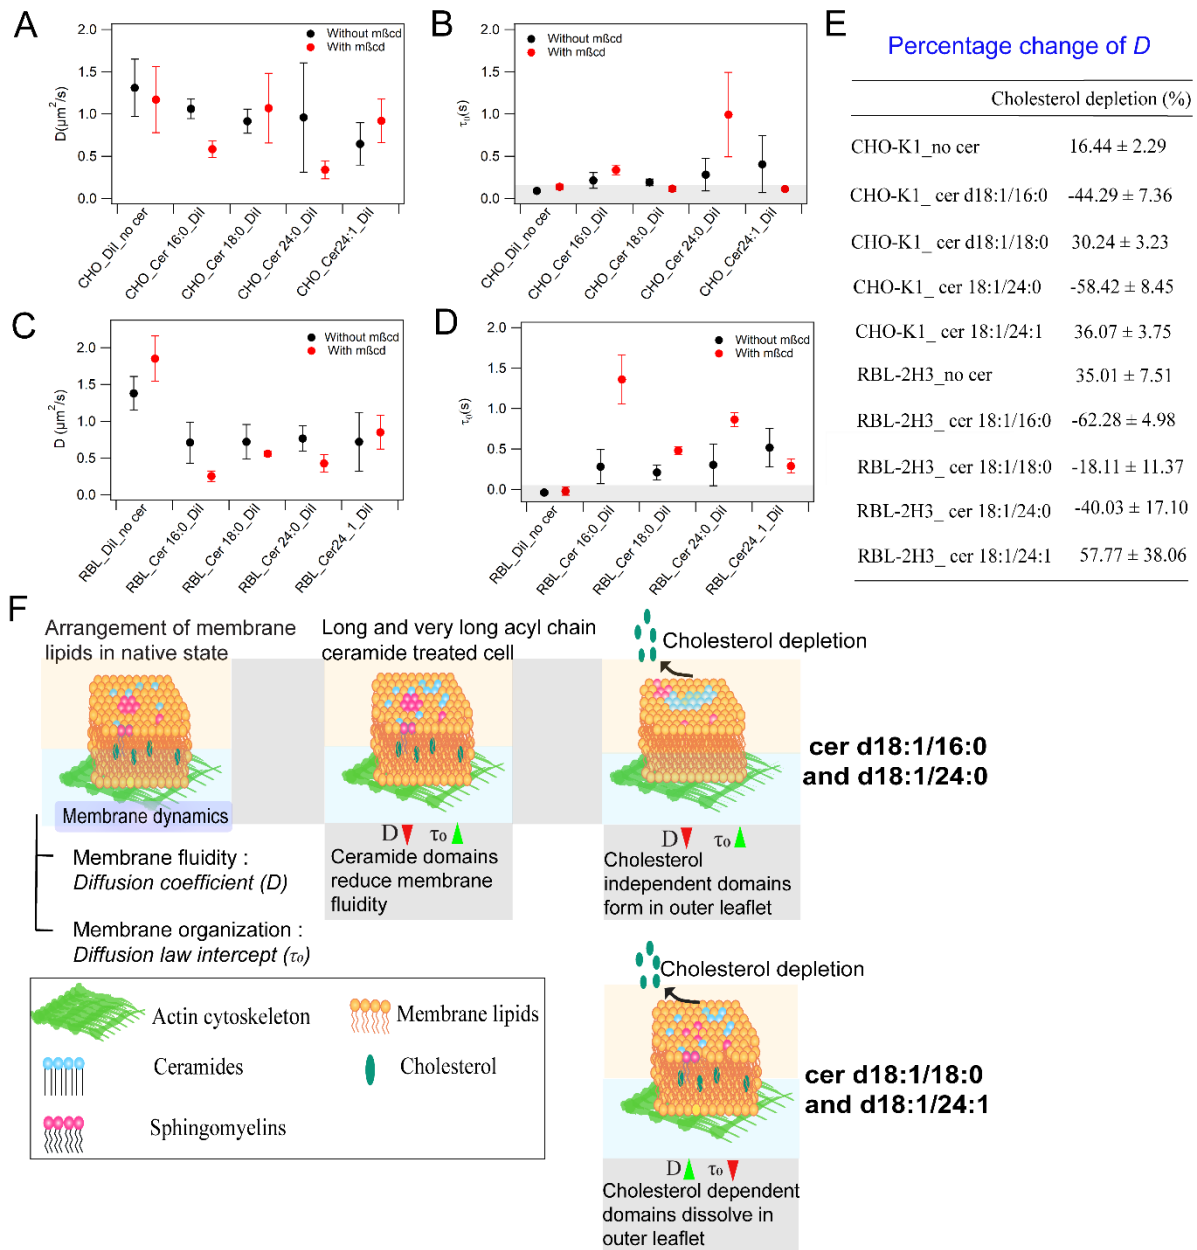

349

350 **Figure 5:** Effect of cholesterol depletion in ceramide (cer d18:1/16:0, cer d18:1/18:0, cer  
 351 d18:1/24:0 and cer d18:1/24:1) treated CHO-K1 and RBL-2H3 cells (A) Comparison of  
 352 diffusion coefficients ( $D$ ) of DiI-C<sub>18</sub> in CHO-K1 cells treated with ceramides (B) Comparison  
 353 of imaging FCS diffusion law plot intercepts ( $\tau_0$ ) obtained for DiI-C<sub>18</sub> in CHO-K1 cells treated  
 354 with ceramides. (C) Comparison of diffusion coefficients ( $D$ ) of DiI-C<sub>18</sub> in RBL-2H3 cells  
 355 treated with ceramides. (D) Comparison of imaging FCS diffusion law plot intercepts ( $\tau_0$ )  
 356 obtained for DiI-C<sub>18</sub> in RBL-2H3 cells treated with ceramides. Grey area in (B) and (D)  
 357 represents the region of free diffusion. (E) Percentage change in the diffusion coefficient ( $D$ )  
 358 before and after the cholesterol depletion. Error bars are the standard deviation (SD) of at least  
 359  $n=3$  (F) Schematic illustration of results.

360 Our results clearly demonstrate that ceramides are sufficient to induce transbilayer coupling in  
361 the cell membranes. Cer d18:1/16:0 and d18:1/24:0 restructure the cytoskeleton arrangement  
362 and lead to the formation of cytoskeleton induced domains in the outer leaflet of the plasma  
363 membrane (Figure 6F).

364

365 **(a) Comparison of plasma membrane lipid composition of RBL cells with lower FcεRI**  
366 **density and wildtype RBL-2H3 cells**

367 For biochemical evidence of the membrane ceramide content-dependent sensitivity of outer  
368 leaflet lipid dynamics to cholesterol and cytoskeleton, we performed lipid composition analysis  
369 of the plasma membrane fractions of RBL-IgE (-) cells and compared it with that of RBL-2H3  
370 cells. In general, no drastic differences were observed in the lipid composition of the two RBL-  
371 2H3 cell variants, except the changes observed in the levels of ceramides and  
372 lysophospholipids (lysophosphatidylcholines and lysophosphatidylethanolamines) as shown in  
373 *Table S1*. The fact that all the major lipids that constitute the plasma membrane remain at  
374 similar levels upon FcεRI knockdown indicates that siRNA treatment on RBL-2H3 cells is  
375 mild enough to preserve the integrity of the plasma membrane, therefore avoiding artifacts.  
376 Upon FcεRI knockdown, there is an increase in LPE levels from 0.44% to 0.67%, and there is  
377 a decrease in ceramide content from 0.59% to 0.29%. An inverse correlation of ceramides and  
378 lysophospholipids has been previously observed in clinical samples also<sup>68</sup>. These results  
379 provide another indication that outer leaflet lipid dynamics is sensitive to the ceramide content  
380 of the plasma membrane.

381

382 **DISCUSSION**

383 Cell membrane organization and dynamics vary across cell types, and certain cell types tend to  
384 show actin induced domain formation on the outer membrane or inter-leaflet coupling<sup>27,43</sup>.  
385 Because of the lack of studies performed on live cells, our understanding of the cell membrane  
386 dynamics is still far from complete. Moreover, the role of fine-tuned lipid composition resulting  
387 in unique cell type-to-cell type membrane properties is not well understood. In this work, we  
388 investigate the factors that can link the outer leaflet lipid diffusion with cytoskeleton and  
389 cholesterol in live cell membranes. Our results show that (i) abundant transmembrane proteins  
390 interacting with actin may not necessarily link outer leaflet diffusion with the cytoskeleton; (ii)

391 cell membrane ceramide content determine the extent of inter-leaflet coupling and cholesterol  
 392 dynamics; (iii) specific long and very long acyl chain ceramides induce the formation of actin

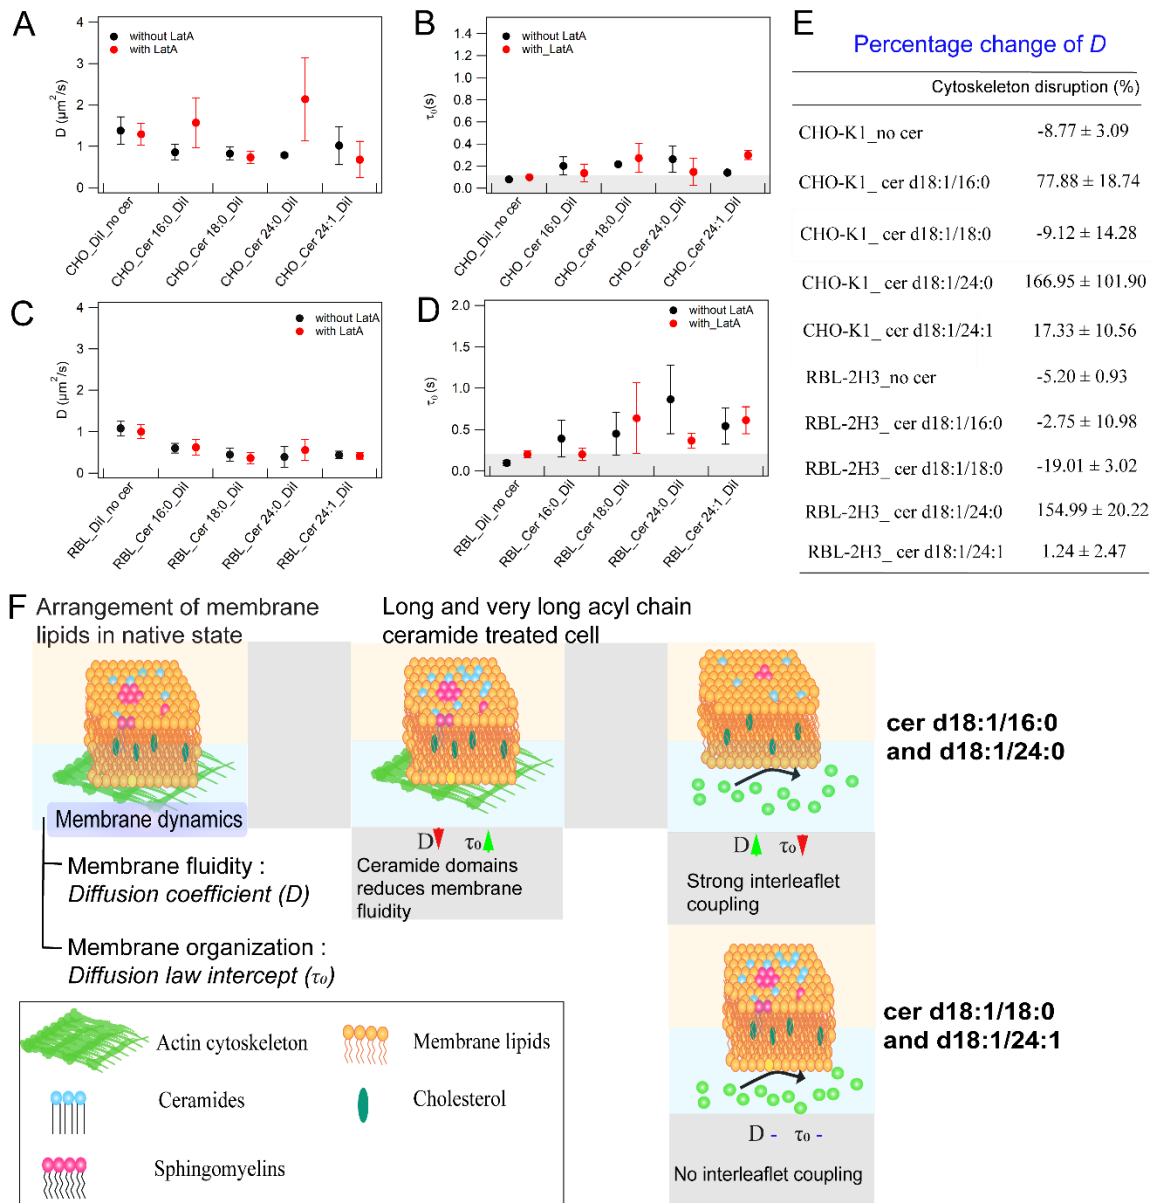

393

394 **Figure 6:** Effect of cytoskeleton disruption in ceramide (cer 18:1/16:0, cer 18:1/18:0, cer  
 395 18:1/24:0 and cer 18:1/24:1) treated CHO-K1 and RBL-2H3 cells (A) Comparison of diffusion  
 396 coefficients ( $D$ ) of DiI-C<sub>18</sub> in CHO-K1 cells treated with ceramides (B) Comparison of imaging  
 397 FCS diffusion law plot intercepts ( $\tau_0$ ) obtained for DiI-C<sub>18</sub> in CHO-K1 cells treated with  
 398 ceramides. (C) Comparison of diffusion coefficients ( $D$ ) of DiI-C<sub>18</sub> in RBL-2H3 cells treated  
 399 with ceramides. (D) Comparison of imaging FCS diffusion law plot intercepts ( $\tau_0$ ) obtained for  
 400 DiI-C<sub>18</sub> in RBL-2H3 cells treated with ceramides. Grey area in (B) and (D) represents the  
 401 region of free diffusion. Error bars are the standard deviation (SD) of at least n=3. (E)  
 402 Percentage change of  $D$  for ceramide treated cells before and after the cytoskeleton disruption.  
 403 (F) Schematic illustration of results.

404



405 cytoskeleton-dependent ordered domains and form cholesterol independent domains in the  
406 outer leaflet.

407

408 *Influence of abundant actin binding transmembrane protein on outer leaflet lipid dynamics in*  
409 *live mammalian cells*

410 Several models have suggested that it is the transmembrane proteins which play a central role  
411 in linking outer leaflet organization with the actin cytoskeletal changes<sup>69–71,72</sup>. In a FRAP-based  
412 study, it was shown that membrane protein density influences the lateral diffusion of membrane  
413 components<sup>16</sup>. Recently, Freeman et al. suggested that transmembrane proteins that interact  
414 with both cytoskeleton, via focal adhesion complex proteins, and extracellular matrix exhibit  
415 membrane compartmentalization<sup>71</sup>. Based on these studies, we investigated the role of FcεRI  
416 receptors, one of the most abundant transmembrane proteins in RBL-2H3 cells known to  
417 interact with the actin cytoskeleton and integrins<sup>50,73,48,49</sup>, in linking outer leaflet lipid diffusion  
418 to cholesterol and cytoskeleton. We found that reducing the density of FcεRI receptors on the  
419 RBL-2H3 cell membranes results in more confined DiI-C<sub>18</sub> diffusion and stronger links of outer  
420 leaflet lipid diffusion with cholesterol and the cytoskeleton (Fig 1B,2). Another interesting  
421 observation was that reducing the FcεRI receptor density reverses the effect of cholesterol  
422 depletion and actin cytoskeleton disruption on DiI-C<sub>18</sub> diffusion in RBL-IgE (-) cell  
423 membranes, as compared to that in RBL-2H3 cells (Figure 2). This means FcεRI knockdown  
424 modulates the membrane organization significantly by increasing the fraction of ordered  
425 domains on the outer leaflet of the membrane. Moreover, there is a formation of cholesterol  
426 independent domains upon cholesterol removal and a drop in the fraction of ordered domains  
427 upon cytoskeleton disruption. This is an interesting observation as in the past only membrane  
428 protein diffusion has been shown to be impeded by the actin tethering and not outer leaflet lipid  
429 diffusion<sup>74</sup>. These experiments suggest that FcεRI does not limit the molecular mobility in the  
430 outer leaflet of the RBL-2H3 plasma membrane. Nevertheless, RBL-IgE(-) cells show elevated  
431 coupling of DiI-C<sub>18</sub> diffusion with the cytoskeleton and cholesterol which indicates that FcεRI  
432 knockdown causes membrane restructuring, which could be due to cytoskeletal remodeling,  
433 change of membrane composition and membrane lipid reorganization. Our lipidomics results  
434 indeed show that modulating the FcεRI density alters the levels of ceramides and  
435 lysophospholipids in the plasma membrane (Table S1) and triggers membrane reorganization,  
436 which is crucial for determining diffusion barriers in the outer leaflet. Despite, the abundance

437 and the interaction of FcεRI with the actin cytoskeleton and focal adhesion complex  
438 proteins<sup>45,49,50</sup> it does not mediate interleaflet coupling. Our results indicate the involvement of  
439 other factors that determine the lateral and transbilayer plasma membrane dynamics. These  
440 observations necessitate further investigation to define the molecular identity of membrane  
441 components that determine the membrane organization and dynamics.

442

443 *Long and very long acyl chain ceramides induce cholesterol independent domain formation in*  
444 *the outer-leaflet of live mammalian cell membranes*

445 There is increasing evidence that sphingolipids can modulate cholesterol dynamics in the  
446 mammalian cell membranes. Castro et al. showed that in the presence of cholesterol, ceramide  
447 domains are solubilized while cholesterol depletion promotes ceramide domain formation<sup>75</sup>.  
448 They also suggested that ceramide domain formation is extremely sensitive to the fluid-gel  
449 transition of the rest of the lipids. Some sphingolipids can cluster together on their own and  
450 form membrane patches<sup>54</sup>. It has been observed that during Gaucher disease, there is an  
451 accumulation of glycosphingolipids that alter the properties of the non-raft fraction of the  
452 membrane<sup>35</sup>. Due to glycosphingolipid accumulation, there was an increase in the confinement  
453 in the non-raft fraction, and they proposed that there is a formation of percolating domains in  
454 the outer leaflet. This is in line with previous literature as it has been shown that ceramides can  
455 displace cholesterol from rafts and form much bigger and more stable domains<sup>37,76,77,63</sup>.  
456 Consistent with these studies, our results show that, upon cholesterol depletion, there is an  
457 increase in DiI-C<sub>18</sub> confinement, and the propensity of cholesterol independent domain  
458 formation is sensitive to membrane ceramide content (Figure 5). We observed cholesterol  
459 independent domain formation specifically in the case of Cer d18:1/16:0 and d18:1/24:0 treated  
460 CHO-K1 and RBL-2H3 cells. Even if a specificity to the ceramide structure was not reported  
461 before, C24 SM has been shown to abolish domain formation and induce partitioning of  
462 cholesterol in the inner leaflet of GUVs<sup>78</sup>.

463 This intricate relationship between cholesterol and ceramides is attributed to the structural  
464 similarity of the two lipid types with a small headgroup and high overall hydrophobicity.  
465 Interestingly, our observations on live mammalian cells measured under physiological  
466 conditions show a similar relationship between cholesterol and ceramide domains.

467 Recently, it has been shown that in the membrane environment ceramides co-segregate with  
468 lysophospholipids due to their large headgroup<sup>79</sup>. The interaction with large headgroup lipids

469 can stabilize ceramide domains. However, it is not clear how lysophospholipids influence  
470 membrane dynamics. Our results showed that the levels of lysophospholipids were  
471 significantly higher in RBL-2H3 cell membranes relative to CHO-K1 cell membranes (Table  
472 1). Comparing the plasma membrane lipid content of RBL-2H3 with RBL-IgE(-) cells, we  
473 observed a change in the levels of ceramide and lysophospholipids (Table *S1*). This result  
474 indicates that co-segregation of ceramides and lysophospholipids may occur in intact cell  
475 membranes.

476

477 *Long and very long acyl chain ceramides mediate inter-leaflet coupling in mammalian cell*  
478 *membranes*

479 Our results show that ceramide treated cells, specifically for Cer d18:1/16:0 and d18:1/24:0,  
480 exhibit inter-leaflet coupling as actin cytoskeleton disruption diminishes ordered domains in  
481 the outer leaflet of the membrane in ceramide treated CHO-K1 cells and RBL-2H3 cells (Figure  
482 6). Moreover, there is evidence of microscopic actin reorganization induced by Cer d18:1/16:0  
483 and d18:1/24:0 treatment (Figure *S4, S5*).

484 There is a growing body of literature demonstrating how ceramides modulate the biophysical  
485 properties of the membrane. It is known that several ceramide interacting proteins are  
486 intracellular, although most of the sphingolipids reside in the outer leaflet of the membrane<sup>80</sup>.  
487 A possible mechanism that can facilitate the interaction of intracellular proteins with ceramides  
488 residing in the plasma membrane is the rapid flip-flop of ceramides in the membrane. The  
489 spontaneous flip-flop of ceramides has been shown in live cells<sup>81</sup>. It has also been observed  
490 that flip-flop of ceramide molecules induces the flip-flop of other membrane lipids<sup>82</sup>.

491 Recently, it was shown that the generation of ceramides reduces the lateral diffusion of  
492 integrins due to increased coupling with the remodeled actin cytoskeletal network<sup>83</sup>. There are  
493 several studies which indicated that ceramides induce cortical actin remodelling, that  
494 influences biomechanical properties<sup>84</sup>, increase the complex assembly that causes actin  
495 polymerization<sup>85</sup>, decrease cell spreading capacity<sup>86</sup> and influence the interaction between the  
496 actin cytoskeleton and ERM proteins<sup>87,65</sup>. Based on our results and the accumulating evidence,  
497 we speculate that levels of ceramides can govern transbilayer coupling in cell membranes due  
498 to their association with integrins.

499 Another possible mechanism that can facilitate lipid-mediated transbilayer coupling is  
500 interdigitation<sup>21,88</sup>. Mayor and colleagues showed that the change in the lipid content in the  
501 outer leaflet could be transduced to the inner leaflet and the transbilayer coupling is important  
502 for GPI-APs (located in outer leaflet) nanoclustering<sup>42</sup> because of the interdigitation that occurs  
503 between long acyl chain lipids residing in the two leaflets. Our observations clearly indicated  
504 that the presence of long and very long acyl chain ceramides induces the transbilayer coupling  
505 in the membrane. We observed the maximum change in outer leaflet lipid diffusion in cells  
506 treated with Cer d18:1/24:0 (Figure 5,6).

507 Conceivably, the interaction of ceramides with the proteins associated with the focal adhesion  
508 complex, their ability to rapidly flip-flop and the interdigitation tendency of long acyl chains  
509 together are responsible for establishing the connection of the outer leaflet with the actin  
510 network organization, which in turn controls the transbilayer membrane properties and  
511 diffusion properties of lipids in the outer leaflet of the membrane.

512

513 *Alterations in membrane dynamics are dependent on ceramide structure*

514 Slight structural differences conferred alteration in the membrane behaviour of ceramide  
515 treated cells, some triggering more dramatic changes in the membrane biophysical properties,  
516 as shown by our results (Figure 5,6) and previously published work<sup>65,89,5</sup>. There is no direct  
517 correlation between the acyl chain length and induced transbilayer-coupling. In addition to the  
518 chain length, the degree of saturation also plays a crucial role in determining the effect of a  
519 lipid in the membrane dynamics, as demonstrated by the difference in the action of Cer  
520 d18:1/24:0 and Cer d18:1/24:1 on DiI-C<sub>18</sub> diffusion.

521 The ceramide species tested in this study are long and very long acyl chain ceramides, and they  
522 all reduced the diffusion coefficient and increased the confinement in the outer leaflet of the  
523 membrane. Our results also showed that different ceramide species have very specific  
524 microscopic effects on the cytoskeleton organization in the membrane which correlates well  
525 with the particular trends that we have observed for cholesterol depletion and cytoskeletal  
526 disruption on DiI-C<sub>18</sub> diffusion (Figure S4, S5). Notably, ceramide species that cause  
527 microscopic disorganization of the cytoskeleton network are the ones that induce domain  
528 formation in response to cholesterol depletion and decrease the membrane order upon  
529 cytoskeleton disruption. This might be a crucial step in the remodeling of membrane dynamics  
530 by ceramides.

531 The mammalian cell membrane lipidome has a considerable amount of C16 and C24  
532 sphingolipids. Perturbation of membrane ceramides is associated with specific pathologies  
533 such as inflammation, type 2 diabetes, obesity, cancer to name a few. Given our results by  
534 lipidomics analysis and the determination of membrane dynamics and organization by ITIR-  
535 FCS, there is a possibility that ceramide-induced changes in the membrane dynamics can be  
536 correlated with certain pathophysiological conditions.

537

## 538 **CONCLUSION**

539 Diffusion in cell membranes is influenced not only by the lipid and protein composition but  
540 also by the asymmetries of the outer and inner leaflets of the membrane as well as the  
541 cytoskeleton that can couple to various cell membrane components. Here, we measured the  
542 diffusion of DiI, an outer lipid membrane marker in RBL-2H3 and CHO-K1 cells to investigate  
543 how proteins and lipids influence the coupling between cytoskeleton and the outer leaflet of  
544 the plasma membrane. These cells were chosen as DiI-C<sub>18</sub> shows free diffusion in CHO-K1  
545 but confined diffusion in RBL-2H3 cells. We demonstrate that for RBL-2H3 cells the abundant  
546 FcεRI transmembrane receptors are not the cause of DiI-C<sub>18</sub> confinement but rather are a factor  
547 to limit its confinement. An analysis of lipid composition between RBL-2H3 and CHO-K1  
548 cells indicated specific differences in ceramides (C16 and C24) between the cells, which turned  
549 out to be the defining factor in DiI-C<sub>18</sub> confinement and its coupling to the cytoskeleton and  
550 cholesterol. This was shown by exogenous treatment of CHO-K1 with long and very long acyl  
551 chain ceramides, which resulted in remodeling of the membrane and in diffusion characteristics  
552 similar to those observed in RBL-2H3 cells. Notably, ceramides d18:1/16:0 and d18:1/24:0 are  
553 sufficient to promote the formation of cholesterol-independent ceramide domains and  
554 interleaflet coupling in the plasma membrane. This study establishes that membrane ceramide  
555 content can remarkably remodel the membrane organization and can be a key factor  
556 determining the transbilayer connections in the membrane.

557

## 558 **MATERIAL AND METHODS**

### 559 **Lipids**

560 Ceramide d18:1/16:0, ceramide d18:1/18:0, ceramide d18:1/24:0 and ceramide d18:1/24:1  
561 lipids were purchased from Avanti Polar Lipids (Alabaster, AL). Ceramides were solubilized  
562 in ethanol. DiI-C<sub>18</sub> (Molecular Probes, Invitrogen, Singapore) stock solution was prepared in  
563 Dimethyl sulfoxide (DMSO; Sigma-Aldrich, Singapore).

#### 564 **Cell culture, transfection, and staining**

565 Cell lines – Chinese hamster ovary (CHO-K1) and rat basophilic leukemia (RBL-2H3) – were  
566 purchased from ATCC (Manassas, VA). Cells were cultured in DMEM medium (Dulbecco's  
567 Modified Eagle Medium; Invitrogen, Singapore), with 10% FBS (fetal bovine serum;  
568 Invitrogen, Singapore) and 1% PS (penicillin and streptomycin; PAA Austria) at physiological  
569 temperature (37 °C) in a 5% (v/v) CO<sub>2</sub> humidified incubator chamber. To ensure that the cells  
570 were in their native state, experiments have been performed on cells with passage number lower  
571 than 20. For measurements, cells were seeded in mattek dishes with 35 mm (MatTek  
572 Corporation, Ashland, Massachusetts, United States). Prior the cell-culture reagents were pre-  
573 heated in water bath adjusted to 37 °C.

574 The stock DiI-C<sub>18</sub> solution (Molecular Probes, Invitrogen, Singapore) was prepared in DMSO.  
575 For DiI staining, stock solution was vigorously vortexed and was diluted in HBSS (Hank's  
576 Balanced Salt Solution; Invitrogen, Singapore) to a final concentration of 100 nM. The cells  
577 were incubated with the working solution of DiI-C<sub>18</sub> at 37 °C for 15-20 minutes. After  
578 incubation, the cells were washed with imaging medium (DMEM with no phenol red  
579 (Invitrogen, Singapore) and 10 % FBS) at least thrice and then the cells were used for imaging.

580 Lifeact-GFP plasmid was a kind gift from Dr. Min Wu (CBIS, NUS). Plasmids transfections  
581 into the cells was done using the Neon<sup>®</sup> Transfection System (Invitrogen, Singapore) according  
582 to the manufacturer's manual containing cell culture medium (DMEM + 10% FBS). Post 20 to  
583 48 hours of incubation, the cells were washed with imaging medium twice and imaged in the  
584 fresh imaging medium.

#### 585 **Drug treatments**

586 Methyl beta-cyclodextrin (m $\beta$ CD) and Latrunculin A (Lat A) were obtained from Sigma-  
587 Aldrich (Singapore), and were solubilized in phosphate-buffered saline (PBS; Fluka  
588 Biochemicals, Singapore). They were diluted further with the imaging medium to prepare final  
589 concentrations of 3 mM and 3  $\mu$ M, respectively. Myriocin (Myr) and sphingomyelinase were

590 purchased from Sigma-Aldrich (Singapore) and were dissolved in phosphate-buffered saline  
591 (PBS; Sigma-Aldrich, Singapore). Further, they were diluted with the imaging medium to make  
592 the required final concentrations. The final concentration of myriocin used was 2  $\mu\text{M}$ . The final  
593 working concentration of sphingomyelinase was 0.0025 U/mL.

#### 594 **Fc $\epsilon$ RI knockdown in RBL-2H3 cells using Fc $\epsilon$ RI $\alpha$ siRNA treatment**

595 For Fc $\epsilon$ RI $\alpha$  knockdown in RBL-2H3 cells, cells were treated with sequence-specific  
596 predesigned siRNA (Ambion, Singapore). 2 nM siRNA was electroporated in approximately  
597  $10^6$  cells, and then the cells were plated on 35 mm uncoated dishes (MatTek Corporation, US).  
598 The cells were incubated at 37 °C for 48 hours before imaging. Western blotting verified the  
599 effect of siRNA treatment. The primary antibody used was anti-rabbit Fc $\epsilon$ RI $\alpha$  (R-180): sc-  
600 98245 (Santa Cruz Biotechnology, Inc, Germany) and secondary antibody was anti-rabbit IgG-  
601 HRP: sc-2357.  $\beta$ -actin was used as the loading control. siRNA mediated knockdown was  
602 further confirmed by imaging cells labelled with Alexa Fluor 488 anti-human Fc $\epsilon$ RI $\alpha$  antibody  
603 AER-37 (CRA-1) (BioLegend Products, Singapore).

#### 604 **Total internal reflection imaging and imaging fluorescence correlation spectroscopy set** 605 **up, data acquisition and data analysis**

##### 606 *Imaging Total internal reflection fluorescence correlation spectroscopy (ITIR-FCS)*

607 FCS measurements were performed on an objective type TIRF microscope (IX-71, Olympus,  
608 Singapore) with a high NA oil immersion objective (PlanApo, 100 $\times$ , NA 1.45, Olympus,  
609 Singapore). A 532 nm laser (Cobolt Samba, Sweden) coupled into the microscope by a  
610 combination of two tilting mirrors was used as the excitation source. The light reflected by a  
611 dichroic mirror (Z488/532RPC, Semrock) is focused on the back focal plane of the objective.  
612 Subsequently, the light is total internally reflected at the glass-water interface by adjusting the  
613 incident angle of the excitation beam by the same combination of tilting mirror. For our  
614 experiments, the laser power used was 0.6-1mW. The fluorescence originating from the  
615 samples was reflected through the same objective followed by transmission through the same  
616 dichroic mirror. Then the fluorescence was filtered by an emission filter (Z488/532M,  
617 Semrock). Lastly, the fluorescence was imaged on the CCD chip of a cooled (-80 °C), back-  
618 illuminated EMCCD camera (Andor iXON 860, 128 $\times$ 128 pixels, Andor technology, US). The  
619 software used for data acquisition is Andor Solis for imaging (version 4.18.30004.0 and  
620 4.24.30004.0). The pixel side length of the CCD chip in the device is 24  $\mu\text{m}$  corresponding to  
621 a pixel side length of 240 nm in the sample plane. The camera was operated in the kinetic mode,

622 and baseline clamp was used to minimize the baseline fluctuations. The readout speed was 10  
623 MHz with 4.7x maximum analog-to-digital gain and 25  $\mu$ s vertical shift speed. An EM gain of  
624 300 was used for most imaging experiments.

625 The fluorescence signal was concurrently recorded from a 21x21 pixels region of  
626 interest (ROI) in the form of a stack of 50,000 frames with a time resolution of 1 ms. The data  
627 was saved as 16-bit Tiff file. The temporal intensity trace from each pixel was autocorrelated  
628 using multi-tau correlation scheme using a FIJI plug-in ImFCS 1.49, an home-written software  
629 which is provided at this link [http://www.dbs.nus.edu.sg/lab/BFL/imfcs\\_image\\_j\\_plugin.html](http://www.dbs.nus.edu.sg/lab/BFL/imfcs_image_j_plugin.html)  
630 to generate autocorrelation functions (ACF)<sup>90</sup>. To circumvent artefact due to bleaching, the  
631 data corrected using a 4<sup>th</sup> order polynomial function. The ACF for each pixel was individually  
632 fitted with the following one-particle model for diffusion using the same software.

$$G(\tau) = \frac{1}{N} \left[ \text{erf}(p(\tau)) + \frac{1}{p(\tau)\sqrt{\pi}} (e^{-(p(\tau))^2} - 1) \right]^2 + G_{\infty}; \quad p(\tau) = \frac{a}{2\sqrt{D\tau + \sigma^2}} \quad (1)$$

633 Here  $G(\tau)$  represents the ACF as a function of correlation time ( $\tau$ ) and  $N$ ,  $a$ ,  $D$  and  $\sigma$  are the  
634 number of particles per pixel, pixel side length, diffusion coefficient and standard deviation of  
635 the Gaussian approximation of the microscope point spread function (PSF) respectively.  $G_{\infty}$  is  
636 the convergence value of the ACF at long correlation times.

637 Fitting of ACFs with theoretical models yields  $D$  and  $N$ . Since measurements are  
638 performed over a whole region of interest parallelly, diffusion coefficient ( $D$ ), and the number  
639 of particles ( $N$ ) maps are spatially resolved<sup>90</sup>. In ITIR-FCS, the data are represented as mean  $\pm$   
640 standard deviation (SD). The SD is obtained from the measurements over 441 pixels per  
641 experiment. The SD of an ITIR-FCS measurement is an indicator of both measurement  
642 variability and the lateral heterogeneity of the membrane. All the measurements were  
643 performed at 37 °C.

644

### 645 **The FCS Diffusion Laws implemented in ITIR-FCS**

646 For probing the sub-resolution plasma membrane organization, FCS diffusion law analysis is  
647 done on data acquired in an ITIR-FCS experiment. With this analysis, one can determine if a  
648 particle is exhibiting free diffusion or is hindered by the trapping sites such as membrane  
649 domains<sup>51</sup>. This is achieved by plotting the spatial dependence of the diffusion time of the  
650 labelled molecules on the observation area. For a freely diffusing particle, the time a particle  
651 takes to diffuse through an area is directly proportional to the area ( $A_{\text{eff}}$ ). Hence, these plots are  
652 fitted to a straight line which is mathematically expressed as:



$$\tau_d(A_{\text{eff}}) = \tau_0 + \frac{A_{\text{eff}}}{D} \quad (2)$$

653 Where  $\tau_0$  is the FCS diffusion law intercept. To get sub-resolution information, the diffusion  
654 law plot is extrapolated to zero and y-intercept ( $\tau_0$ ) is used as a determinant of membrane  
655 organization. For a freely diffusing particle, the diffusion time scales linearly with the  
656 observation area and the y-intercept is zero. In case of a domain partitioning, the relationship  
657 between the diffusion time of the molecules and the observation area deviates from linearity  
658 and y-intercept is positive. To perform FCS Diffusion Law analysis, the same set of data that  
659 is acquired in an ITIR-FCS experiment is used. Post-acquisition pixel binning (1x1 to 5x5)  
660 followed by convolution with the PSF of the microscope system is performed to obtain variable  
661 observation areas ( $A_{\text{eff}}$ ). The  $A_{\text{eff}}/D$  is plotted against  $A_{\text{eff}}$ , and the plot is fitted to a line with the  
662 standard error of mean (SEM) weighted equation (2) to obtain the y-intercept  $\tau_0$ . The typical  
663 margin of error on cell membranes is  $\pm 0.1$  and thus intercepts in that range are indistinguishable  
664 for free diffusion. Only intercepts greater than 0.1 can be attributed to domain trapping in our  
665 setup<sup>91</sup>.

666

#### 667 **Plasma membrane isolation and lipid extraction**

668 The protocol used for plasma membrane isolation is adapted from Cohen et al. and is slightly  
669 modified to increase the yield<sup>92</sup>. For plasma membrane extraction approximately  $10^7$  cells of  
670 each cell line were taken. Cells were attached on the lysine coated cytodex3 beads (Sigma-  
671 Aldrich, Singapore) by incubating  $10^7$  cells overnight with 4 mL beads. Cells were maintained  
672 at 37 °C with slow shaking. Cells attached on beads were collected via 37  $\mu\text{m}$  reversible  
673 strainer, large (Stem cell technologies, Singapore). The media was discarded, and cells attached  
674 to beads were collected in 1X PBS. 1X PBS was aspirated (without aspirating beads), and the  
675 beads were resuspended in the attachment buffer (220 mM Sucrose, 40 mM sodium acetate,  
676 pH 5.0) at room temperature and were incubated for 5 minutes. Then the attachment buffer was  
677 aspirated out, and beads were resuspended in hypotonic buffer (10mM Tris-HCl, pH 8.0). After  
678 5 minutes incubation, beads were washed with hypotonic buffer three times, and the beads  
679 were sonicated. The sonication strength was optimized so that it doesn't damage the beads.  
680 Then the beads were washed at least two times with hypotonic solution. 700  $\mu\text{L}$  of beads were  
681 resuspended in 500  $\mu\text{L}$  of cold butanol/methanol (1:1) spiked with 5  $\mu\text{L}$  of SPLASH  
682 LIPIDOMIX Mass Spec Standard (330707) and 5  $\mu\text{L}$  of Ceramide/Sphingoid Internal Standard  
683 Mixture I (LM6002), from AVANTI. It was incubated at 4 °C for 2 hours with shaking. To  
684 separate beads from the solvent, beads were centrifuged at 10,000 rpm for 15 minutes at 4 °C.

685 Then the collected supernatant was evaporated, and it was reconstituted in 100  $\mu$ L of solvent  
686 without the standards. The samples were then subjected to liquid chromatography electrospray  
687 ionization tandem mass spectrometry (LC-MS) using Agilent 1290 Infinity LC coupled to an  
688 Agilent 6495 triple quadrupole mass spectrometer.

### 689 **Liquid chromatography-mass spectrometry of cell extracts: Instrumentation, data** 690 **acquisition and data analysis**

691 An Agilent ZORBAX RRHD Eclipse plus C18, 95  $\text{\AA}$ , 2.1 x 100 mm, 1.8  $\mu$ m UPLC column  
692 was used for LC separation at 40  $^{\circ}$ C. Mobile phases A (60% water and 40% acetonitrile with  
693 10 mM ammonium formate) and B (10% acetonitrile and 90% isopropanol with 10 mM  
694 ammonium formate) were used to create the following gradient: 20% B at 0 min to 60% B at  
695 2min; 100% B at 7 min; 100%B at 9 min, 20%B at 9.01 min and 20%B at 10.8 min. The flow  
696 rate was set at 0.4 mL/min, and 2  $\mu$ L of sample were injected. The capillary voltage and nozzle  
697 voltage were set at 3,500 V and 500 V, respectively. The drying gas and sheath gas  
698 temperatures were maintained at 200  $^{\circ}$ C and 250  $^{\circ}$ C, respectively. The drying gas and sheath  
699 gas flow rates were 12 L/min and 12 L/min, respectively. Data was exported and analyzed with  
700 Mass Hunter Quant Software (Agilent) and the lipids quantified after normalizing for each  
701 class-specific internal standard spiked before lipid extraction. A correction for the initial  
702 amount of cells was also applied.

703 For the technical validation of the lipidomics dataset, we analysed internal standards  
704 concentration, three biological replicates for each sample and quality control samples (QC).  
705 Technical reproducibility of the data is ensured by calculating the coefficient of variation of  
706 lipids analysed across QC samples and by maintaining a signal-to-noise ratio of at least 10.

### 707 **Image analysis and quantification**

708 To quantify the filament number, length and lifeact intensity within each cell, the Imaris  
709 software package “Cells” module (Bitplane, USA Version 8) was used to batch process the  
710 cells.

711

712

713

714

715 **REFERENCES**

- 716 1. Kusumi A, Sako Y. Cell surface organization by the membrane skeleton. *Cell*.  
717 1996;8(4):566-574. doi:10.1016/S0955-0674(96)80036-6
- 718 2. Lingwood D, Simons K. Lipid Rafts As a Membrane- Organizing Principle. *Science*  
719 (80- ). 2010;327(5961):46-50. doi:10.1126/science.1174621
- 720 3. Kusumi A, Fujiwara TK, Chadda R, et al. Dynamic Organizing Principles of the  
721 Plasma Membrane that Regulate Signal Transduction: Commemorating the Fortieth  
722 Anniversary of Singer and Nicolson's Fluid-Mosaic Model. *Annu Rev Cell Dev Biol*.  
723 2012;28(1):215-250. doi:10.1146/annurev-cellbio-100809-151736
- 724 4. Simons K, Ikonen E. Functional rafts in cell membranes. *Nature*. 1997;387(6633):569-  
725 572. doi:10.1038/42408
- 726 5. Maula T, Sazzad A Al, Slotte JP. Influence of Hydroxylation , Chain Length , and  
727 Chain Unsaturation on Bilayer Properties of Ceramides. *Biophysj*. 2015;109(8):1639-  
728 1651. doi:10.1016/j.bpj.2015.08.040
- 729 6. Benda A, Benes M, Marec V, Lhotsky A, Hermens WT, Heyrovsky J. How To  
730 Determine Diffusion Coefficients in Planar Phospholipid Systems by Confocal  
731 Fluorescence Correlation Spectroscopy. *Langmuir*. 2003;9(14):4120-4126.  
732 doi:10.1021/la0270136
- 733 7. Sezgin E, Levental I, Grzybek M, et al. Partitioning , diffusion , and ligand binding of  
734 raft lipid analogs in model and cellular plasma membranes. *BBA - Biomembr*.  
735 2012;1818(7):1777-1784. doi:10.1016/j.bbamem.2012.03.007
- 736 8. Honigsmann A, Mueller V, Hell SW, Eggeling C. STED microscopy detects and  
737 quantifies liquid phase separation in lipid membranes using a new far-red emitting  
738 fluorescent phosphoglycerolipid analogue. *Faraday Discuss*. 2013:77-89.  
739 doi:10.1039/c2fd20107k
- 740 9. García-Sáez AJ, Chiantia S, Schwille P. Effect of line tension on the lateral  
741 organization of lipid membranes. *J Biol Chem*. 2007;282(46):33537-33544.  
742 doi:10.1074/jbc.M706162200
- 743 10. Chiantia S, Ries J, Kahya N, Schwille P. Combined AFM and Two-Focus SFCS Study  
744 of Raft-Exhibiting Model Membranes. *ChemPhysChem*. 2006;7:2409-2418.  
745 doi:10.1002/cphc.200600464
- 746 11. Chiantia S, Kahya N, Ries J, Schwille P. Effects of Ceramide on Liquid-Ordered  
747 Domains Investigated by Simultaneous AFM and FCS. *Biophys J*.  
748 2006;90(June):4500-4508. doi:10.1529/biophysj.106.081026
- 749 12. Busto J V, Garcı AB, Wolf C, Baka L. N-Nervonoylsphingomyelin ( C24 : 1 )  
750 Prevents Lateral Heterogeneity in Cholesterol-Containing Membranes. *Biophys J*.  
751 2014;106(June):2606-2616. doi:10.1016/j.bpj.2014.04.054
- 752 13. Benda A, Fagulova V, Deyneka A, J Enderlein A, M Hof. Fluorescence Lifetime  
753 Correlation Spectroscopy Combined with Lifetime Tuning : New Perspectives in  
754 Supported Phospholipid Bilayer. *Langmuir*. 2006;76(033106):9580-9585.  
755 doi:10.1021/la061573d

- 756 14. Bacia K, Scherfeld D, Kahya N, Schwille P. Fluorescence correlation spectroscopy  
757 relates rafts in model and native membranes. *Biophys J*. 2004;87(2):1034-1043.  
758 doi:10.1529/biophysj.104.040519
- 759 15. Honigsmann A, Sadeghi S, Keller J, Hell SW, Eggeling C, Vink R. A lipid bound actin  
760 meshwork organizes liquid phase separation in model membranes. *Elife*. 2014;2014(3).  
761 doi:10.7554/eLife.01671
- 762 16. Frick M, Schmidt K, Nichols BJ. Modulation of Lateral Diffusion in the Plasma  
763 Membrane by Protein Density. *Curr Biol*. 2007;17(5):462-467.  
764 doi:10.1016/j.cub.2007.01.069
- 765 17. Duncan AL, Reddy T, Koldsø H, et al. Protein crowding and lipid complexity  
766 influence the nanoscale dynamic organization of ion channels in cell membranes. *Sci*  
767 *Rep*. 2017;(November):1-15. doi:10.1038/s41598-017-16865-6
- 768 18. Linden M, Sens P PR. Entropic Tension in Crowded Membranes. *PLoS Comput Biol*.  
769 2012;8(3):1-10. doi:10.1371/journal.pcbi.1002431
- 770 19. Li G, Kim J, Huang Z, St. Clair JR, Brown DA, London E. Efficient replacement of  
771 plasma membrane outer leaflet phospholipids and sphingolipids in cells with  
772 exogenous lipids. *Proc Natl Acad Sci*. 2016;113(49):14025-14030.  
773 doi:10.1073/pnas.1610705113
- 774 20. Heberle FA, Marquardt D, Doktorova M, et al. Subnanometer Structure of an  
775 Asymmetric Model Membrane: Interleaflet Coupling Influences Domain Properties.  
776 *Langmuir*. 2016;32(20):5195-5200. doi:10.1021/acs.langmuir.5b04562
- 777 21. Chiantia S, London E. Acyl Chain length and saturation modulate interleaflet coupling  
778 in asymmetric bilayers: Effects on dynamics and structural order. *Biophys J*.  
779 2012;103(11):2311-2319. doi:10.1016/j.bpj.2012.10.033
- 780 22. Wang T, Silvius JR. Cholesterol Does Not Induce Segregation of Liquid-Ordered  
781 Domains in Bilayers Modeling the Inner Leaflet of the Plasma Membrane. *Biophys J*.  
782 2001;81(November):2762-2773.
- 783 23. Bretscher MS. Asymmetrical Lipid Bilayer Structure for Biological Membranes. *Nat*  
784 *New Biol*. 1972;236:11-12.
- 785 24. Devaux PF. Static and Dynamic Lipid Asymmetry in Cell Membranes. *Biochemistry*.  
786 1991;30(5):1163-1173. doi:10.1021/bi00219a001
- 787 25. Fujimoto T, Parmryd I. Interleaflet Coupling , Pinning , and Leaflet Asymmetry —  
788 Major Players in Plasma Membrane Nanodomain Formation. *Front Cell Dev Biol*.  
789 2017;4(January):1-12. doi:10.3389/fcell.2016.00155
- 790 26. Sezgin E, Kaiser H-J, Baumgart T, Schwille P, Simons K, Levental I. Elucidating  
791 membrane structure and protein behavior using giant plasma membrane vesicles. *Nat*  
792 *Protoc*. 2012;7(6):1042-1051. doi:10.1038/nprot.2012.059
- 793 27. Huang S, Lim SY, Gupta A, Bag N, Wohland T. Plasma membrane organization and  
794 dynamics is probe and cell line dependent. *Biochim Biophys Acta - Biomembr*.  
795 2017;1859(9):1483-1492. doi:10.1016/j.bbamem.2016.12.009
- 796 28. Pike LJ, Han X, Chung K, Gross RW. Lipid Rafts Are Enriched in Arachidonic Acid  
797 and Plasmenylethanolamine and Their Composition Is Independent of Caveolin-1

- 798 Expression : A Quantitative Electrospray Ionization / Mass Spectrometric Analysis †.  
799 *Biochemistry*. 2002;2075-2088. doi:10.1021/bi0156557
- 800 29. Mayor S, Rao M. Rafts: Scale-dependent, active lipid organization at the cell surface.  
801 *Traffic*. 2004;5(4):231-240. doi:10.1111/j.1600-0854.2004.00172.x
- 802 30. Klymchenko AS, Kreder R. Fluorescent Probes for Lipid Rafts: From Model  
803 Membranes to Living Cells. *Chem Biol*. 2014;21(1):97-113.  
804 doi:10.1016/j.chembiol.2013.11.009
- 805 31. Lingwood D, Kaiser H-J, Levental I, Simons K. Lipid rafts as functional heterogeneity  
806 in cell membranes. *Biochem Soc Trans*. 2009;37(5):955-960.  
807 doi:10.1042/BST0370955
- 808 32. Simons K, Vaz WLC. Model Systems, Lipid Rafts, and Cell Membranes. *Annu Rev*  
809 *Biophys Biomol Struct*. 2004;33(1):269-295.  
810 doi:10.1146/annurev.biophys.32.110601.141803
- 811 33. Yuan C, Furlong J, Burgos P, Johnston LJ. The Size of Lipid Rafts : An Atomic Force  
812 Microscopy Study of Ganglioside GM1 Domains in Sphingomyelin / DOPC /  
813 Cholesterol Membranes. *Biophys J*. 2002;82(May):2526-2535.
- 814 34. Hofman EG, Ruonala MO, Bader AN, et al. EGF induces coalescence of different lipid  
815 rafts. *J Cell Sci*. 2008;121(Pt 15):2519-2528. doi:10.1242/jcs.028753
- 816 35. Batta G, Soltész L, Kovács T, et al. Alterations in the properties of the cell membrane  
817 due to glycosphingolipid accumulation in a model of Gaucher disease. *Sci Rep*.  
818 2018;8(1):1-13. doi:10.1038/s41598-017-18405-8
- 819 36. Gombos I, Steinbach G, Pomozi I, et al. Some new faces of membrane microdomains:  
820 A complex confocal fluorescence, differential polarization, and FCS imaging study on  
821 live immune cells. *Cytom Part A*. 2008;73(3):220-229. doi:10.1002/cyto.a.20516
- 822 37. Bollinger CR, Teichgräber V, Gulbins E. Ceramide-enriched membrane domains.  
823 *Biochim Biophys Acta - Mol Cell Res*. 2005;1746(3):284-294.  
824 doi:10.1016/j.bbamer.2005.09.001
- 825 38. Sheets ED, Lee GM, Simson R, Jacobson K. Transient confinement of a  
826 glycosylphosphatidylinositol-anchored protein in the plasma membrane. *Biochemistry*.  
827 1997;36(41):12449-12458. doi:10.1021/bi9710939
- 828 39. Ogiso H, Taniguchi M, Okazaki T. Analysis of lipid-composition changes in plasma  
829 membrane microdomains. *J Lipid Res*. 2015;56. doi:10.1194/jlr.M059972
- 830 40. Marcus D, Collins S, Sarah L, Keller. Tuning lipid mixtures to induce or suppress  
831 domain formation across leaflets of unsupported asymmetric bilayers. *Proc Natl Acad*  
832 *Sci*. 2008;105(1).
- 833 41. Kiessling V, Wan C, Tamm LK. Domain coupling in asymmetric lipid bilayers. *BBA -*  
834 *Biomembr*. 2009;1788(1):64-71. doi:10.1016/j.bbamer.2008.09.003
- 835 42. Raghupathy R, Anilkumar A.A, Polley A, Singh P.P, Yadav M, Johnson C,  
836 Suryawanshi S, Saikam V, Sawant S.D, Panda A, Guo Z, Vishwakarma RA, Rao M  
837 MS. Transbilayer Lipid Interactions Mediate Nanoclustering of Lipid-Anchored  
838 Proteins. *Cell*. 2015;161(3):581-594. doi:10.1016/j.cell.2015.03.048

- 839 43. Dinic J, Ashrafzadeh P, Parmryd I. Actin filaments attachment at the plasma  
840 membrane in live cells cause the formation of ordered lipid domains. *Biochim Biophys*  
841 *Acta - Biomembr.* 2013;1828(3):1102-1111. doi:10.1016/j.bbamem.2012.12.004
- 842 44. Thomas J.L, Holowka D, Baird B and WW. Large-Scale Co-aggregation of  
843 Fluorescent Lipid Probes with Cell Surface Proteins. *J Cell Biol.* 1994;125(4):795-802.
- 844 45. Davey AM, Walvick RP, Liu Y, Heikal AA, Sheets ED. Membrane order and  
845 molecular dynamics associated with IgE receptor cross-linking in mast cells. *Biophys*  
846 *J.* 2007;92(1):343-355. doi:10.1529/biophysj.106.088815
- 847 46. Pierini L, Holowka D, Baird B. FcεRI-mediated association of 6-μm beads with RBL-  
848 2H3 mast cells results in exclusion of signaling proteins from the forming phagosome  
849 and abrogation of normal downstream signaling. *J Cell Biol.* 1996;134(6):1427-1439.  
850 doi:10.1083/jcb.134.6.1427
- 851 47. Pyenta PS, Schwille P, Webb WW, Holowka D, Baird B. Lateral diffusion of  
852 membrane lipid-anchored probes before and after aggregation of cell surface IgE-  
853 receptors. *J Phys Chem A.* 2003;107(40):8310-8318. doi:10.1021/jp030005t
- 854 48. Shelby SA, Veatch SL, Holowka DA, Baird BA, Lippincott-schwartz J. Functional  
855 nanoscale coupling of Lyn kinase with IgE-Fc ε RI is restricted by the actin  
856 cytoskeleton in early antigen-stimulated signaling. *Mol Biol Cell.* 2016;27:3645-3658.  
857 doi:10.1091/mbc.E16-06-0425
- 858 49. Andrews NL, Lidke KA, Pfeiffer JR, et al. Actin restricts FcεRI diffusion and  
859 facilitates antigen-induced receptor immobilisation. *Nat Cell Biol.* 2011;10(8):955-  
860 963. doi:10.1038/ncb1755.Actin
- 861 50. Torres AJ, Vasudevan L, Holowka D, Baird BA. Focal adhesion proteins connect IgE  
862 receptors to the cytoskeleton as revealed by micropatterned ligand arrays. *Proc Natl*  
863 *Acad Sci.* 2008.
- 864 51. Wawrezynieck L, Rigneault H, Marguet D, Lenne PF. Fluorescence correlation  
865 spectroscopy diffusion laws to probe the submicron cell membrane organization.  
866 *Biophys J.* 2005. doi:10.1529/biophysj.105.067959
- 867 52. Ng XW, Bag N, Wohland T. Characterization of Lipid and Cell Membrane  
868 Organization by the Fluorescence Correlation Spectroscopy Diffusion Law. *Chim Int J*  
869 *Chem.* 2015. doi:10.2533/chimia.2015.112
- 870 53. Veerapathiran S, Wohland T. The imaging FCS diffusion law in the presence of  
871 multiple diffusive modes. *Methods.* 2017. doi:10.1016/j.ymeth.2017.11.016
- 872 54. Kraft ML. Sphingolipid Organization in the Plasma Membrane and the Mechanisms  
873 That Influence It. *Front Cell Dev Biol.* 2017;4(January):1-19.  
874 doi:10.3389/fcell.2016.00154
- 875 55. Frisz JF, Lou K, Klitzing HA, et al. Direct chemical evidence for sphingolipid domains  
876 in the plasma membranes of fibroblasts. *Proc Natl Acad Sci.* 2013;110(8):E613-E622.  
877 doi:10.1073/pnas.1216585110
- 878 56. Pralle A, Keller P, Florin EL, Simons K, Hörber JKH. Sphingolipid-cholesterol rafts  
879 diffuse as small entities in the plasma membrane of mammalian cells. *J Cell Biol.*  
880 2000;148(5):997-1007. doi:10.1083/jcb.148.5.997

- 881 57. Nicolson GL. The Fluid - Mosaic Model of Membrane Structure: Still relevant to  
882 understanding the structure, function and dynamics of biological membranes after  
883 more than 40 years. *Biochim Biophys Acta - Biomembr.* 2014;1838(6):1451-1466.  
884 doi:10.1016/j.bbamem.2013.10.019
- 885 58. Miyake Y, Kozutsumi Y, Nakamura S FT and KT. Serine palmitoyltransferase is the  
886 primary target of a sphingosine-like immunosuppressant, ISP-1/myriocin. *Biochem*  
887 *Biophys Res Commun.* 1995;21(2):396-403.
- 888 59. Goñi FM, Alonso A. Biophysics of sphingolipids I. Membrane properties of  
889 sphingosine, ceramides and other simple sphingolipids. *Biochim Biophys Acta -*  
890 *Biomembr.* 2006;1758(12):1902-1921. doi:10.1016/j.bbamem.2006.09.011
- 891 60. Futerman AH, Hannun YA. The complex life of simple sphingolipids. *EMBO Rep.*  
892 2004;5(8):777-782. doi:10.1038/sj.embor.7400208
- 893 61. Yu C, Alterman M, Dobrowsky RT, Lawrence H. Ceramide Displaces Cholesterol  
894 from Lipid Raft Membranes and Decreases the Association of the Cholesterol Binding  
895 Protein Caveolin-1. *J Lipid Res.* 2005;(8):1678-1691.
- 896 62. Sot J, Ibarguren M, Busto J V., Montes LR, Goñi FM, Alonso A. Cholesterol  
897 displacement by ceramide in sphingomyelin-containing liquid-ordered domains, and  
898 generation of gel regions in giant lipidic vesicles. *FEBS Lett.* 2008;582(21-22):3230-  
899 3236. doi:10.1016/j.febslet.2008.08.016
- 900 63. Alonso A, Go M. The Physical Properties of Ceramides in Membranes. *Annu Rev*  
901 *Biophys.* 2018;(March):1-22. doi:10.1146/annurev-biophys-070317-033309
- 902 64. Gidwani A, H. Alex Brown HA HD and BB. Disruption of lipid order by short-chain  
903 ceramides correlates with inhibition of phospholipase D and downstream signaling by  
904 Fc RI. *J Cell Sci.* 2003;116(15):3177-3187. doi:10.1242/jcs.00621
- 905 65. Zeidan YH, Jenkins RW, Hannun YA. Remodeling of cellular cytoskeleton by the acid  
906 sphingomyelinase/ceramide pathway. *J Cell Biol.* 2008;181(2):335-350.  
907 doi:10.1083/jcb.200705060
- 908 66. Schuchman EH. Acid sphingomyelinase , cell membranes and human disease :  
909 Lessons from Niemann – Pick disease. *FEBS Lett.* 2010;584(9):1895-1900.  
910 doi:10.1016/j.febslet.2009.11.083
- 911 67. Riedl J, Crevenna AH, Kessenbrock K, et al. Lifeact : a versatile marker to visualize F-  
912 actin. *Nat Methods.* 2008;5(7):605-608. doi:10.1038/NMETH.1220
- 913 68. Drobnik W, Liebisch G, Audebert F, et al. Plasma ceramide and  
914 lysophosphatidylcholine inversely correlate with mortality in sepsis patients. *J Lipid*  
915 *Res.* 2003;4:754-761.
- 916 69. Goswami D, Gowrishankar K, Bilgrami S, et al. Nanoclusters of GPI-Anchored  
917 Proteins Are Formed by Cortical Actin-Driven Activity. *Cell.* 2008;135(6):1085-1097.  
918 doi:10.1016/j.cell.2008.11.032
- 919 70. Lillemeier BF, Pfeiffer JR, Surviladze Z, Wilson BS, Davis MM. Plasma membrane-  
920 associated proteins are clustered into islands attached to the cytoskeleton. *Proc Natl*  
921 *Acad Sci.* 2006;103(50):18992-18997. doi:10.1073/pnas.0609009103
- 922 71. Freeman SA, Vega A, Riedl M, et al. Transmembrane Pickets Connect Cyto- and

- 923 Pericellular Skeletons Forming Barriers to Receptor Engagement. *Cell*. 2018;172(1-  
924 2):305-312.e10. doi:10.1016/j.cell.2017.12.023
- 925 72. Nakada C, Ritchie K, Oba Y, et al. Accumulation of anchored proteins forms  
926 membrane diffusion barriers during neuronal polarization. 2003;5(7).
- 927 73. Wakefield DL, Holowka D, Baird B, Lidke D. The Fc  $\epsilon$  RI signaling cascade and  
928 integrin trafficking converge at patterned ligand surfaces. *Mol Biol Cell*.  
929 2017;28:3383-3396. doi:10.1091/mbc.E17-03-0208
- 930 74. Saha S, Lee I, Polley A, Groves JT, Rao M, Mayor S. Diffusion of GPI-anchored  
931 proteins is influenced by the activity of dynamic cortical actin. *Mol Biol Cell*. 2015;26.  
932 doi:10.1091/mbc.E15-06-0397
- 933 75. Castro BM, Silva LC, Fedorov A, Almeida RFM De. Cholesterol-rich fluid  
934 membranes solubilize ceramide domains. Implications for the structure and dynamics  
935 of mammalian intracellular and plasma membrane. *J Biol Chem*. 2009;1-19.  
936 doi:10.1074/jbc.M109.026567
- 937 76. Megha, London E. Ceramide selectively displaces cholesterol from ordered lipid  
938 domains (rafts): Implications for lipid raft structure and function. *J Biol Chem*.  
939 2004;279(11):9997-10004. doi:10.1074/jbc.M309992200
- 940 77. Castro B.M., Silva L.C., Fedorov A, de Almeida R.F.M PM. Cholesterol-rich fluid  
941 membranes solubilize ceramide domains: Implications for the structure and dynamics  
942 of mammalian intracellular and plasma membranes. *J Biol Chem*.  
943 2009;284(34):22978-22987. doi:10.1074/jbc.M109.026567
- 944 78. Courtney KC, Pezeshkian W, Raghupathy R, et al. C24 Sphingolipids Govern the  
945 Transbilayer Asymmetry of Cholesterol and Lateral Organization of Model and Live-  
946 Cell Plasma Membranes Article C24 Sphingolipids Govern the Transbilayer  
947 Asymmetry of Cholesterol and Lateral Organization of Model and Live-Cell. *Cell Rep*.  
948 2018;24(4):1037-1049. doi:10.1016/j.celrep.2018.06.104
- 949 79. Al Sazzad MA, Mouts A, Ortega JP, Lin KL, Nyholm T.K.M and SJ. Natural  
950 Ceramides and Lysophospholipids Cosegregate in Fluid Phosphatidylcholine Bilayers.  
951 *Biophys J*. 2019;116:1105-1114. doi:10.1016/j.bpj.2019.02.002
- 952 80. Kronke M. Biophysics of ceramide signaling : interaction with proteins and phase  
953 transition of membranes. *Chem Phys Lipids*. 1999;101:109-121.
- 954 81. Mitsutake S, Igarashi Y. Transbilayer movement of ceramide in the plasma membrane  
955 of live cells. *Biochem Biophys Res Commun*. 2007;359(3):622-627.  
956 doi:10.1016/j.bbrc.2007.05.160
- 957 82. Contreras F, Sánchez-magraner L, Alonso A, Goñi FM. Transbilayer ( flip-flop ) lipid  
958 motion and lipid scrambling in membranes. *FEBS Lett*. 2010;584(9):1779-1786.  
959 doi:10.1016/j.febslet.2009.12.049
- 960 83. Eich C, Manzo C, Keijzer S De, et al. Changes in membrane sphingolipid composition  
961 modulate dynamics and adhesion of integrin nanoclusters. *Sci Rep*. 2016;6(October  
962 2015):1-15. doi:10.1038/srep20693
- 963 84. Babahosseini H, Roberts PC, Schmelz EM, Agah M. Bioactive sphingolipid  
964 metabolites modulate ovarian cancer cell structural mechanics. *Integr Biol*.  
965 2013;5(11):1385. doi:10.1039/c3ib40121a



- 966 85. Park SS, Kim MO, Yun SP, et al. C16-Ceramide-induced F-actin regulation stimulates  
967 mouse embryonic stem cell migration: Involvement of N-WASP/Cdc42/Arp2/3  
968 complex and cofilin-1/ $\alpha$ -actinin. *Biochim Biophys Acta - Mol Cell Biol Lipids*.  
969 2013;1831(2):350-360. doi:10.1016/j.bbalip.2012.09.005
- 970 86. Mueller, N., Avota, E., Collenburg, L., Grassme, H. and Schneider-Schaulies S.  
971 Neutral sphingomyelinase in physiological and measles. *Plos Pathog*. 2014;10(12).
- 972 87. Adada M, Canals D, Hannun YA, Obeid LM. Sphingolipid regulation of ezrin, radixin,  
973 and moesin proteins family: Implications for cell dynamics. *Biochim Biophys Acta -*  
974 *Mol Cell Biol Lipids*. 2014;1841(5):727-737. doi:10.1016/j.bbalip.2013.07.002
- 975 88. Kiessling V. Transbilayer Coupling of Lipid Dynamics. *Biophysj*. 2012;103(12):2409-  
976 2410. doi:10.1016/j.bpj.2012.11.010
- 977 89. Pinto SN, Silva LC, Futerman AH, Prieto M. Effect of ceramide structure on  
978 membrane biophysical properties: The role of acyl chain length and unsaturation.  
979 *Biochim Biophys Acta - Biomembr*. 2011;1808(11):2753-2760.  
980 doi:10.1016/j.bbamem.2011.07.023
- 981 90. Sankaran J, Shi X, Ho LY, Stelzer EHK, Wohland T. ImFCS: A software for Imaging  
982 FCS data analysis and visualization. *Opt Express*. 2010. doi:10.1364/OE.18.025468
- 983 91. Sankaran J, Bag N, Kraut RS, Wohland T. Accuracy and precision in camera-based  
984 fluorescence correlation spectroscopy measurements. *Anal Chem*. 2013.  
985 doi:10.1021/ac303485t
- 986 92. Cohen CM, Kalish DI, Jacobson BS BD. Membrane isolation on polylysine-coated  
987 beads : Plasma Membrane from HeLa Cells Derivatization of of Polyacrylamide Beads  
988 Preparation and Use. *J Cell Biol*. 1977;75:119-134.

989

990

991

992

993

994

995

996

997

998

999
